# Supplementary material for: Contextual and cross-modality modulation of auditory cortical processing through pulvinar mediated suppression
Source: eLife. 2020 Mar 6;9:e54157. doi: 10.7554/eLife.54157 (PMC7080503; doi:10.7554/eLife.54157)
Supplement: Figure 1—source data 1. [file elife-54157-fig1-data1.xlsx]

## Sheet: Figure 1
LP ArchT, A1 L2/3 recording
Norm. Spontaneous rates			Norm. Evoked rates			Norm. Bandwidth			Norm. SNR
LED OFF	LED ON		LED OFF	LED ON		LED OFF	LED ON		LED OFF	LED ON
1	1.78103		1	1.10384		1	1.3393		1	0.619779
1	1.19108		1	1.1283		1	1.11838		1	0.947293
1	1.34598		1	1.45754		1	1.16071		1	1.08288
1	1.81623		1	1.78925		1	1.15627		1	0.985145
1	1.49759		1	1.00217		1	1.06731		1	0.669191
1	1.95386		1	1.51672		1	1.08928		1	0.776265
1	3.89582		1	1.82257		1	1.23971		1	0.467825
1	3.54159		1	1.38551		1	1.5493		1	0.39121
LP ChR2, A1 L2/3 recording
Norm. Spontaneous rates			Norm. Evoked rates			Norm. Bandwidth			Norm. SNR
LED OFF	LED ON		LED OFF	LED ON		LED OFF	LED ON		LED OFF	LED ON
1	0.394845		1	0.499581		1	0.861111		1	0.750505
1	0.846348		1	0.635188		1	0.946502		1	1.42967
1	0.598072		1	0.199261		1	0.512954		1	1.01994
1	0.643728		1	0.92032		1	0.935779		1	1.58679
1	0.598556		1	0.610492		1	0.695312		1	1.08709
1	0.62038		1	0.984412		1	0.908333		1	0.962009
1	0.644064		1	0.700156		1	0.554546		1	1.50864
1	0.820553		1	0.78938		1	0.870968		1	1.19747
1	0.23224		1	0.350367		1	0.802817		1	1.26424
1	0.560051		1	0.708041		1	0.813492		1	1.35076
1	0.732558		1	0.989512		1	0.815476		1	1.29019
1	0.427516		1	0.274096		1	0.694611		1	1.27241
1	0.705038		1	0.897096		1	0.672043		1	1.08455
LP ArchT, Norm. FR LED OFF vs LED ON, example neuron				LP ArchT, Norm. FR LED OFF vs LED ON, example neuron
0.0416667	0.166667			0.296435	0.212007
0.125	0.458333			0.296435	0.183865
0.25	0.583333			0.35272	0.268293
0.416667	0.625			0.465291	0.296435
0.541667	0.791667			0.634146	0.380863
0.625	1			0.831144	0.521576
0.75	0.791667			0.915572	0.662289
0.625	0.708333			1	0.746717
0.5	0.75			0.971857	0.774859
0.416667	0.583333			0.931145	0.859287
0.191667	0.291667			0.874859	0.774859
0.0833333	0.208333			0.818574	0.774859
0.0833333	0.208333			0.790431	0.774859
0.0416667	0.125			0.746717	0.718574
				0.831144	0.662289
				0.774859	0.634146
				0.774859	0.521576
				0.634146	0.409006
				0.606004	0.465291
				0.521576	0.380863
				0.380863	0.296435
				0.493433	0.324578
				0.493433	0.296435
				0.409006	0.155722
				0.35272	0.12758
				0.296435	0.12758
Linear fit, R2			Linear fit, slope			Linear fit, Y-intercept
LP ArchT	LP ChR2		LP ArchT	LP ChR2		LP ArchT	LP ChR2
0.98	0.85		1.22	1.1		0.082	-0.32
0.71	0.94		0.94	0.84		0.4	-0.084
0.8	0.93		1.27	0.983		0.27	-0.197
0.88	0.96		1.1	0.95		0.14	-0.14
0.91	0.9		1.24	0.792		0.13	-0.064
0.87	0.87		0.93	0.896		0.22	-0.23
0.74	0.87		0.9	1.3		0.31	-0.45
0.86	0.85		0.83	0.6		0.32	-0.089
	0.9			0.96			-0.14
	0.89			1.12			-0.33
	0.79			0.84			-0.064
	0.98			0.96			-0.16
	0.68			0.93			-0.17

## Sheet: Figure 1-figure supplements
CF							BW20
LP ArchT, A1 L2/3 recording			LP ChR2, A1 L2/3 recording				ArchT			ChR2
LED OFF	LED ON		LED OFF	LED ON			LED OFF	LED ON		LED OFF	LED ON
13	13		29	29			1	1.33333		1	0.861538
5.6	5.6		26	26			1	1.5		1	0.8
17	17		15	15			1	1.17544		1	0.855422
18.3	18.3		30	30			1	1.2069		1	0.9375
17	17		27	27			1	1.44828		1	1.02353
21	21		30	30			1	1.14286		1	0.64
17	17		17	17			1	1.73529		1	0.809524
18.6	18.6		29	29			1	1.52527		1	0.856061
			22	22						1	0.699029
			30	30						1	0.712963
			12	12						1	0.778689
			27.8	27.8						1	0.709677
			21	21						1	0.823764
A1 L4 recording
LP ArchT						LP ChR2
Norm Spont FR			Norm Evoked FR			Norm Spont FR			Norm Evoked FR
LED OFF	LED ON		LED OFF	LED ON		LED OFF	LED ON		LED OFF	LED ON
1	1.43652		1	1.08295		1	0.966687		1	1.08295
1	1.27558		1	1.10361		1	1.01179		1	1.10361
1	0.836036		1	0.922008		1	0.973023		1	0.922008
1	0.684189		1	0.971846		1	1.0134		1	0.971846
1	0.934586		1	1.00217		1	0.62038		1	1.00217
						1	0.8		1	0.886793
						1	0.875		1	1.06349
						1	0.75		1	0.969388
						1	0.75		1	0.930233
						1	1.1		1	1.08929
						1	0.833333		1	1.03158
						1	1.4		1	1.04546
