# Supplementary material for: Contextual and cross-modality modulation of auditory cortical processing through pulvinar mediated suppression
Source: eLife. 2020 Mar 6;9:e54157. doi: 10.7554/eLife.54157 (PMC7080503; doi:10.7554/eLife.54157)
Supplement: Figure 2—source data 1. [file elife-54157-fig2-data1.xlsx]

## Sheet: Figure 2
LP-A1 terminal eNpHR3.0, A1 L2/3 recording										LP-A1 fluorescence intensity across cortical depth
Norm. Spont. Rates			Norm. Evoked rates							depth (μm)	section 1	section 2	section 3	section 4	section 5	section 6
LED OFF	LED ON		LED OFF	LED ON						1	0.169141	0.412507	0.329905	0.000917	0.150326	0
1	1.45753		1	0.77083						2	0.244205	0.480218	0.388024	0.003965	0.159157	0
1	2.03395		1	1.37951						3	0.31916	0.528534	0.447852	0.006082	0.19397	0.000282
1	2.21845		1	1.61159						4	0.396349	0.557449	0.509502	0.008167	0.243008	0.001588
1	1.36704		1	1.0787						5	0.546115	0.546593	0.549507	0.0261	0.228898	0.007974
1	0.94921		1	1.2258						6	0.678178	0.535906	0.572214	0.035214	0.22809	0.032908
1	1.91666		1	1.70222						7	0.792323	0.525595	0.574828	0.041207	0.241903	0.06763
1	1.07883		1	1.69367						8	0.857714	0.538555	0.572391	0.079116	0.285524	0.10782
1	3.31793		1	1.123						9	0.904035	0.587157	0.576787	0.139274	0.338908	0.149543
1	1.55835		1	1.78558						10	0.935665	0.669454	0.59108	0.218081	0.395738	0.199387
										11	0.959857	0.724036	0.589454	0.326777	0.453029	0.260387
Norm. Bandwidth			Norm. SNR							12	0.982858	0.778154	0.59187	0.436128	0.472419	0.306691
LED OFF	LED ON		LED OFF	LED ON						13	1	0.830897	0.603299	0.54145	0.522839	0.368588
1	1.30281		1	0.528861						14	0.98142	0.832467	0.569525	0.628809	0.62966	0.445649
1	1.05599		1	0.727						15	0.985862	0.830231	0.519886	0.665141	0.707471	0.538911
1	1.14714		1	0.726448						16	0.997827	0.824582	0.453537	0.679294	0.787552	0.628728
1	1.21527		1	0.789077						17	0.980565	0.823146	0.39759	0.686396	0.869574	0.696734
1	1.25132		1	1.03392						18	0.986876	0.827319	0.365151	0.669268	0.917469	0.706038
1	0.963057		1	0.888117						19	0.987195	0.838229	0.377498	0.64768	0.947141	0.689287
1	1.47533		1	0.647						20	0.911472	0.908878	0.379679	0.633002	0.967033	0.660326
1	2.0174		1	0.759846						21	0.851154	0.945409	0.406161	0.606599	1	0.621073
1	1.16789		1	1.14582						22	0.789984	0.950373	0.497121	0.594007	0.998202	0.56764
										23	0.702462	0.917937	0.584537	0.613154	0.986785	0.527427
LP-A1 terminal ChR2, A1 L2/3 recording										24	0.646508	0.87336	0.647196	0.63599	0.990902	0.500236
Norm. Spont. Rates			Norm. Evoked rates							25	0.617717	0.820157	0.642635	0.635025	0.968784	0.480994
LED OFF	LED ON		LED OFF	LED ON						26	0.63619	0.820023	0.585408	0.595933	0.94607	0.480925
1	0.544331		1	0.31487						27	0.590293	0.820034	0.507235	0.524776	0.934285	0.485298
1	0.430705		1	0.926897						28	0.52387	0.82274	0.419222	0.47327	0.942101	0.473517
1	0.598		1	0.7257						29	0.45546	0.886442	0.334423	0.45075	0.963057	0.458849
1	0.898395		1	1.05508						30	0.431392	0.946899	0.260576	0.418054	0.997312	0.435264
1	0.613201		1	0.618386						31	0.423435	1	0.226039	0.39462	0.987978	0.397992
1	0.850629		1	0.883073						32	0.426007	0.954971	0.209311	0.381197	0.947723	0.39001
1	1.05177		1	0.989026						33	0.429459	0.917748	0.203199	0.356427	0.881068	0.360098
1	0.78708		1	0.778298						34	0.442668	0.886277	0.208621	0.358775	0.803317	0.308903
1	0.424184		1	0.80832						35	0.474194	0.841248	0.215525	0.385188	0.723396	0.271081
1	1.00338		1	0.843562						36	0.440887	0.80783	0.22084	0.421025	0.656934	0.243052
										37	0.407957	0.784089	0.210662	0.445767	0.648323	0.218248
Norm. Bandwidth			Norm. SNR							38	0.393459	0.764614	0.173779	0.462389	0.641626	0.186178
LED OFF	LED ON		LED OFF	LED ON						39	0.36161	0.771282	0.123778	0.477008	0.6378	0.181895
1	0.756256		1	0.929651						40	0.339026	0.796207	0.103978	0.469668	0.639151	0.191864
1	0.901143		1	1.08964						41	0.333159	0.779271	0.093724	0.451986	0.616941	0.214051
1	0.881322		1	1.3182						42	0.313426	0.752427	0.090736	0.446837	0.593391	0.22806
1	0.531141		1	0.988842						43	0.306893	0.71884	0.09463	0.443041	0.573937	0.238689
1	1.03508		1	1.01641						44	0.318904	0.700435	0.109705	0.438828	0.543562	0.24638
1	0.946685		1	1.24035						45	0.333264	0.683804	0.132572	0.430601	0.511312	0.251775
1	0.909302		1	1.43575						46	0.306935	0.671353	0.124647	0.44293	0.479423	0.235309
1	0.974945		1	1.17028						47	0.234231	0.697809	0.117012	0.445106	0.477915	0.204065
1	0.599393		1	1.38078						48	0.212612	0.759986	0.109647	0.395685	0.457855	0.164701
1	0.683902		1	1.35265						49	0.199813	0.839916	0.103029	0.392401	0.429404	0.148252
										50	0.194976	0.800866	0.089091	0.398905	0.422396	0.138849
Linear fit, R2			Linear fit, slope			Linear fit, Y-intercept				51	0.187961	0.753224	0.06754	0.398017	0.392119	0.129793
eNpHR3.0	ChR2		eNpHR3.0	ChR2		eNpHR3.0	ChR2			52	0.18222	0.697975	0.0727	0.372043	0.359931	0.13167
0.99	0.985		1.01	0.8		0.167	-0.06			53	0.178255	0.627826	0.072515	0.340965	0.351257	0.129564
0.79	0.707		1.19	0.75		0.292	-0.19			54	0.187715	0.549906	0.065173	0.31004	0.309742	0.123336
0.9	0.868		1.297	0.93		0.14	-0.138			55	0.191109	0.47184	0.074917	0.297368	0.269216	0.149514
0.872	0.675		0.974	0.82		0.309	-0.164			56	0.187144	0.456341	0.077359	0.301384	0.245332	0.171304
0.936	0.826		1.383	1.04		0.234	-0.277			57	0.151812	0.46831	0.068572	0.32645	0.233703	0.179812
0.888	0.831		0.921	1.127		0.197	-0.127			58	0.128718	0.492843	0.048315	0.338113	0.227807	0.141054
0.975	0.804		1.167	0.951		0.0887	-0.232			59	0.11455	0.441734	0.038473	0.31759	0.227234	0.109177
0.783	0.883		0.711	1.322		0.11	-0.325			60	0.104664	0.411004	0.046343	0.259113	0.224091	0.081581
0.69	0.906		0.837	0.805		0.154	-0.245			61	0.101386	0.397658	0.08121	0.226169	0.213615	0.058238
	0.868			0.98			-0.108			62	0.098922	0.415562	0.107322	0.209013	0.197456	0.038807
										63	0.076962	0.410995	0.111493	0.206023	0.183439	0.033141
										64	0.074449	0.390069	0.098381	0.161426	0.183914	0.0426
										65	0.083016	0.360673	0.079455	0.13963	0.199461	0.027763
										66	0.095707	0.33933	0.055096	0.137725	0.24393	0.03363
										67	0.088303	0.323896	0.053962	0.14971	0.276657	0.052859
										68	0.071459	0.312705	0.058729	0.165828	0.309266	0.068219
										69	0.053581	0.287537	0.064958	0.184283	0.350436	0.081181
										70	0.058496	0.254739	0.071775	0.199435	0.334854	0.091908
										71	0.068792	0.236166	0.083189	0.201692	0.301142	0.099478
										72	0.067304	0.231655	0.10677	0.195632	0.255038	0.103289
										73	0.047381	0.232245	0.09714	0.183528	0.220802	0.102193
										74	0.026431	0.199342	0.078292	0.179108	0.190784	0.095541
										75	0.01982	0.177405	0.06525	0.175711	0.164961	0.090173
										76	0.021981	0.168051	0.040647	0.163874	0.149845	0.076815
										77	0.02527	0.202725	0.016768	0.157995	0.123324	0.060644
										78	0.025355	0.21935	0.013403	0.153379	0.093178	0.062626
										79	0.025095	0.221919	0.013689	0.146572	0.084253	0.067751
										80	0.024248	0.20378	0.015174	0.135783	0.095459	0.070703
										81	0.022356	0.174493	0.014423	0.123459	0.109896	0.064922
										82	0.019586	0.143181	0.013344	0.110083	0.108953	0.043329
										83	0.017368	0.146822	0.011374	0.096433	0.090549	0.026421
										84	0.016433	0.155047	0.004978	0.081112	0.069404	0.019814
										85	0.020531	0.163147	0.0033	0.062971	0.051019	0.015357
										86	0.022178	0.151188	0.004357	0.04662	0.035419	0.014423
										87	0.018841	0.149302	0.004496	0.03338	0.028552	0.014914
										88	0.024756	0.14939	0.006692	0.024236	0.031783	0.006023
										89	0.029472	0.122901	0.009879	0.026583	0.026471	0.006771
										90	0.031194	0.111142	0.007849	0.0298	0.024628	0.010179
										91	0.027702	0.108746	0.009011	0.033144	0.025804	0.009188
										92	0.025045	0.111552	0.012579	0.035378	0.028978	0.005746
										93	0.023833	0.085986	0.013914	0.036388	0.029519	0.004691
										94	0.021572	0.0488	0.016952	0.036054	0.027751	0.007939
										95	0.017377	0.039614	0.021626	0.030668	0.022408	0.005154
										96	0.011149	0.03793	0.035558	0.032323	0.026221	0.005547
										97	0.008083	0.038642	0.034974	0.038246	0.033948	0.008201
										98	0.006235	0.028688	0.019651	0.030374	0.043816	0.005696
										99	0.005553	0.024518	0.013843	0.023205	0.060803	0.005295
										100	0.00551	0.023	0.010653	0.016983	0.069404	0.005853
										101	0.008656	0.018524	0.010264	0.013994	0.063905	0.006266
										102	0.013948	0.021699	0.016705	0.012658	0.066989	0.00641
										103	0.011354	0.026555	0.019525	0.01383	0.066826	0.005008
										104	0.01044	0.01797	0.017106	0.022412	0.063729	0.001209
										105	0.010559	0.017723	0.01354	0.019272	0.071649	0.004167
										106	0.008709	0.021019	0.010716	0.011819	0.067491	0.005924
										107	0.007816	0.019783	0.009159	0.006255	0.054976	0.00612
										108	0.007594	0.022712	0.009053	0.005181	0.039859	0.004936
										109	0.007765	0.026074	0.010049	0.005343	0.02492	0.002521
										110	0.007853	0.020563	0.012607	0.004929	0.012648	0.000743
										111	0.008086	0.017935	0.01545	0.004467	0.007934	0.003331
										112	0.009362	0.016683	0.01837	0.004643	0.019877	0.003686
										113	0.008372	0.015012	0.021346	0.006153	0.033093	0.003426
										114	0.006844	0.011957	0.017815	0.004686	0.041327	0.003095
										115	0.007843	0.009621	0.013764	0.002982	0.025368	0.002508
										116	0.008723	0.014097	0.011762	0.001739	0.011759	0.002703
										117	0.009561	0.012906	0.012678	0.002336	0.004019	0.003636
										118	0.010433	0.009797	0.013623	0.002518	0.005654	0.003801
										119	0.009373	0.010598	0.012566	0.001867	0.005052	0.003228
										120	0.007862	0.010653	0.013236	0.004504	0.00293	0.002088
										121	0.007118	0.010665	0.014385	0.005099	0.003055	0.000381
										122	0.011294	0.012101	0.015303	0.003234	0.003428	0.000342
										123	0.01379	0.009846	0.012893	0.002818	0.003504	0.001049
										124	0.008029	0.007799	0.01009	0.005189	0.001932	0.00226
										125	0.006544	0.01428	0.010562	0.009894	0.001312	0.001609
										126	0.005745	0.01553	0.011845	0.010427	0.001248	0.002325
										127	0.004023	0.016042	0.01355	0.010131	0.00175	0.004428
										128	0.004777	0.023624	0.015552	0.008872	0.000962	0.001675
										129	0.005777	0.022711	0.015439	0.004404	0.000671	0.001006
										130	0.006245	0.018389	0.01515	0.004947	0.001425	0.001476
										131	0.004434	0.015683	0.020183	0.007795	0.001699	0.001366
										132	0.004163	0.012048	0.016969	0.006138	0.001568	0.003134
										133	0.007118	0.009949	0.009582	0.007114	0.001097	0.006859
										134	0.008033	0.015728	0.007468	0.008305	0.00116	0.013383
										135	0.007755	0.016479	0.007117	0.004961	0.000994	0.008248
										136	0.006097	0.016171	0.008243	0.005717	0.000926	0.003707
										137	0.009014	0.020179	0.012637	0.006601	0.002183	0.001475
										138	0.009582	0.016679	0.013017	0.002842	0.002729	0.000815
										139	0.006584	0.011518	0.010389	0.004642	0.003062	0.00032
										140	0.00949	0.012052	0.009082	0.005887	0.003627	0.000131
										141	0.01026	0.015714	0.007671	0.001655	0.006323	0.000902
										142	0.008241	0.018009	0.006172	0.003021	0.006746	0.000615
										143	0.008956	0.010427	0.004838	0.004519	0.002158	0.000175
										144	0.011245	0.009137	0.005947	0.003808	0.001104	0.00023
										145	0.014959	0.010813	0.009479	0.003379	0.000499	9.16e-05
										146	0.010367	0.014087	0.00758	0.003041	3.65e-06	9.81e-05
										147	0.00771	0.016809	0.006547	0.002774	0.000506	0.000325
										148	0.006787	0.018953	0.006575	0.00367	0.000939	0.001041
										149	0.006128	0.019822	0.008301	0.004417	0.001188	0.000986
										150	0.007434	0.014607	0.009194	0.004831	0.000371	0.000423
										151	0.009963	0.010025	0.008916	0.002685	0.000463	9.23e-05
										152	0.008603	0.01567	0.010691	0.003225	0.001068	0.000754
										153	0.008814	0.015802	0.012275	0.006688	0.001822	0.001322
										154	0.010035	0.01506	0.013332	0.007369	0.001814	0.000716
										155	0.010631	0.018333	0.015652	0.006277	0.001447	0.00063
										156	0.009916	0.020507	0.019054	0.003834	0.000818	0.000489
										157	0.008706	0.020825	0.024004	0.004426	0.001753	0.000159
										158	0.009365	0.016382	0.02647	0.005225	0.001922	0.000432
										159	0.007884	0.011128	0.031818	0.006086	0.000602	0.000645
										160	0.005589	0.007008	0.04347	0.006234	0.000186	0.000751
										161	0.004866	0.007442	0.04583	0.006419	0	0.000476
										162	0.005017	0.008643	0.042735	0.006575	6.2e-05	0.000549
										163	0.005536	0.009764	0.031862	0.006457	0.001131	0.000828
										164	0.005919	0.009798	0.022626	0.004646	0.001282	0.001269
										165	0.008616	0.00784	0.015162	0.002832	0.000862	0.002079
										166	0.011727	0.005911	0.011185	0.004075	0.000547	0.002196
										167	0.013172	0.006145	0.010138	0.005793	0.0005	0.001205
										168	0.018066	0.005853	0.010026	0.00789	0.000628	0.000967
										169	0.022285	0.006084	0.009998	0.010583	0.000942	0.000957
										170	0.02135	0.008389	0.012248	0.010004	0.000952	0.001135
										171	0.028508	0.008149	0.01331	0.00811	0.000686	0.00141
										172	0.034109	0.007886	0.006997	0.005328	5.75e-05	0.00097
										173	0.030453	0.009957	0.005393	0.004309	5.71e-05	0.000838
										174	0.027106	0.010457	0.005764	0.004844	0.000235	0.0026
										175	0.023058	0.009219	0.005931	0.007566	0.00057	0.001605
										176	0.017403	0.004476	0.00658	0.006401	0.003273	0.00048
										177	0.014734	0.005213	0.008428	0.006272	0.004149	9.48e-05
										178	0.012159	0.006712	0.01563	0.008521	0.003502	2.6e-05
										179	0.008737	0.00561	0.014735	0.009456	0.002182	0
										180	0.007632	0.008251	0.010158	0.008611	0.003802	0.000143
										181	0.007007	0.012377	0.012605	0.00571	0.005382	0.001629
										182	0.006603	0.017455	0.01433	0.003905	0.001045	0.001286
										183	0.006218	0.01727	0.015243	0.003705	0.001861	0.000302
										184	0.008704	0.016157	0.012657	0.005068	0.003418	0.000247
										185	0.015166	0.016691	0.009673	0.005156	0.002978	0.000104
										186	0.015628	0.012764	0.006882	0.004081	0.005725	0.000204
										187	0.017356	0.009378	0.012333	0.002339	0.006575	0.000755
										188	0.02114	0.010714	0.011924	0.004529	0.003935	0.000529
										189	0.015068	0.009311	0.006725	0.005168	0.005697	0.000422
										190	0.012353	0.00714	0.009366	0.005012	0.00582	0.000447
										191	0.013628	0.004968	0.00887	0.006758	0.004194	0.000117
										192	0.010241	0.008387	0.005338	0.005055	0.002685	0.000356
										193	0.008289	0.012475	0.010141	0.002092	0.004127	0.00067
										194	0.007749	0.014446	0.012503	0.002329	0.006515	0.000119
										195	0.008387	0.01515	0.012114	0.00314	0.003938	0.000345
										196	0.010262	0.014697	0.016052	0.003691	0.003859	0.000708
										197	0.012851	0.012258	0.016458	0.002389	0.004116	0.000928
										198	0.010321	0.011917	0.012231	0.00315	0.002419	0.000337
										199	0.009332	0.011036	0.008469	0.004362	0.001943	0.000243
										200	0.009739	0.007596	0.006063	0.004835	0.00309	0.00068
										201	0.012736	0.009547	0.005535	0.005917	0.006609	0.000185
										202	0.01228	0.011002	0.00553	0.007365	0.00604	0.000104
										203	0.00959	0.008162	0.005363	0.009258	0.005268	0.000204
										204	0.006975	0.008249	0.004835	0.006907	0.004719	3.88e-05
										205	0.008548	0.007947	0.008444	0.004644	0.002771	0.000337
										206	0.013283	0.005141	0.010544	0.003963	0.001738	0.000557
										207	0.022339	0.005656	0.008625	0.005647	0.001555	0.000337
										208	0.029305	0.006699	0.008861	0.007495	0.002435	0.000564
										209	0.033059	0.007167	0.008708	0.009152	0.00207	0.000605
										210	0.02717	0.009209	0.006789	0.010006	0.001686	0.000503
										211	0.01661	0.010026	0.008145	0.008241	0.003634	0.003228
										212	0.007921	0.007387	0.010608	0.003477	0.002906	0.004512
										213	0.013342	0.01048	0.013806	0.008567	0.002662	0.004572
										214	0.013712	0.011912	0.015784	0.01189	0.005365	0.003251
										215	0.012213	0.007068	0.016904	0.013159	0.003848	0.003532
										216	0.010683	0.013202	0.01657	0.008454	0.001906	0.003612
										217	0.010902	0.017556	0.015888	0.00659	0.000335	0.00207
										218	0.011963	0.013213	0.015075	0.007127	0.003806	0.000772
										219	0.013791	0.010526	0.014241	0.009346	0.005364	0.000129
										220	0.015889	0.009405	0.013132	0.010434	0.004864	0.000247
										221	0.01788	0.010775	0.011945	0.010338	0.003921	0.000743
										222	0.019475	0.014059	0.010917	0.00726	0.002748	0.000556
										223	0.024347	0.01661	0.008351	0.007967	0.001519	9.63e-05
										224	0.025374	0.016911	0.005398	0.009359	0.000765	0.000702
										225	0.017594	0.017909	0.004341	0.004831	0.000949	0.000706
										226	0.012087	0.020352	0.00614	0.006517	0.001745	0.000568
										227	0.009302	0.025363	0.009176	0.008979	0.00319	0.000623
										228	0.010471	0.028859	0.009732	0.005279	0.003004	0.000345
										229	0.016883	0.027658	0.009796	0.004367	0.002597	0.000851
										230	0.020889	0.017971	0.009284	0.004523	0.002472	0.002451
										231	0.020336	0.01522	0.006253	0.005085	0.003836	0.005507
										232	0.016757	0.013738	0.006614	0.00636	0.00401	0.004849
										233	0.015031	0.012235	0.009245	0.007037	0.002641	0.001899
										234	0.016073	0.014445	0.008772	0.006119	0.002516	0.001954
										235	0.017195	0.01781	0.00678	0.008677	0.001896	0.001033
										236	0.020724	0.022086	0.00379	0.010777	0.001066	0.000783
										237	0.027017	0.023683	0.009212	0.011103	0.001631	0.003315
										238	0.048924	0.025116	0.011059	0.009565	0.00124	0.001606
										239	0.061919	0.027086	0.009529	0.00881	0.000707	0.001027
										240	0.065239	0.028484	0.013053	0.009402	0.001461	0.003119
										241	0.042386	0.026626	0.016129	0.008478	0.001928	0.003721
										242	0.030993	0.019143	0.018715	0.007556	0.002109	0.002655
										243	0.029569	0.012928	0.017484	0.006727	0.001857	0.000518
										244	0.021533	0.011053	0.013364	0.008436	0.001985	0.000243
										245	0.014602	0.016398	0.005884	0.009011	0.002148	0.000272
										246	0.008938	0.017892	0.008723	0.008482	0.002274	0.00038
										247	0.008194	0.018794	0.01099	0.006795	0.003609	0.000325
										248	0.00893	0.019696	0.011462	0.007504	0.00409	0.001592
										249	0.010829	0.020802	0.009173	0.009647	0.003686	0.002063
										250	0.013869	0.021813	0.007825	0.008227	0.002868	0.000907
										251	0.013133	0.022614	0.008436	0.0071	0.00209	0.000388
										252	0.010479	0.019058	0.00619	0.007039	0.001795	9.88e-05
										253	0.010267	0.015905	0.005199	0.012277	0.00387	0
										254	0.011052	0.014435	0.007257	0.013978	0.003122	0
										255	0.011771	0.014024	0.007238	0.01351	0.001798	0.000333
										256	0.009517	0.012633	0.006542	0.01132	0.002049	0.000895
										257	0.011521	0.009426	0.005263	0.011483	0.000921	0.001665
										258	0.014312	0.014965	0.00459	0.01116	0.000753	0.002525
										259	0.012334	0.016659	0.004799	0.006366	0.002827	0.002677
										260	0.012864	0.010445	0.006801	0.007142	0.001171	0.001631
										261	0.014537	0.013082	0.005806	0.00818	6.2e-05	0.001107
										262	0.016684	0.015543	0.005552	0.005665	1.15e-05	0.001207
										263	0.02538	0.01601	0.00989	0.006353	0.000891	0.001724
										264	0.033327	0.022418	0.010672	0.007693	0.001771	0.000678
										265	0.03286	0.025725	0.011126	0.008877	0.002687	0.001682
										266	0.035646	0.02322	0.014629	0.010903	0.003881	0.002833
										267	0.036168	0.024824	0.012196	0.011448	0.003741	0.000685
										268	0.028961	0.024876	0.009012	0.009436	0.002978	0.000759
										269	0.026051	0.021903	0.012627	0.007478	0.002412	0.001598
										270	0.023656	0.014348	0.010684	0.007111	0.006021	0.002754
										271	0.020212	0.0103	0.007181	0.008797	0.007535	0.001406
										272	0.01982	0.012137	0.009072	0.008069	0.001626	0.000767
										273	0.019513	0.015913	0.009089	0.008861	0.001417	0.001064
										274	0.018301	0.019383	0.008191	0.011357	0.001979	0.00167
										275	0.012499	0.022122	0.007968	0.011742	0.002356	0.001961
										276	0.00944	0.020385	0.008585	0.013736	0.002491	0.002015
										277	0.011821	0.019388	0.011433	0.016684	0.002584	0.00185
										278	0.011729	0.020056	0.029619	0.012186	0.002591	0.002067
										279	0.011127	0.018797	0.040479	0.011615	0.001774	0.002567
										280	0.010192	0.020923	0.045049	0.013593	0.001497	0.003392
										281	0.009336	0.028005	0.034955	0.013297	0.001539	0.002015
										282	0.007713	0.025493	0.033708	0.015446	0.001476	0.001208
										283	0.005141	0.024313	0.039232	0.018476	0.001727	0.001248
										284	0.012245	0.026084	0.034198	0.018506	0.001972	0.000972
										285	0.018043	0.024424	0.029513	0.01556	0.001846	0.00297
										286	0.02204	0.022786	0.025145	0.011475	0.001823	0.005559
										287	0.015857	0.02155	0.020306	0.008427	0.002636	0.004513
										288	0.010878	0.017209	0.02756	0.013438	0.004867	0.016722
										289	0.007287	0.018402	0.047471	0.017399	0.003075	0.030861
										290	0.010753	0.027188	0.053154	0.00935	0.00241	0.039945
										291	0.0119	0.026519	0.044999	0.009141	0.003446	0.047705
										292	0.011194	0.026626	0.020862	0.010595	0.002252	0.051479
										293	0.012129	0.028597	0.012762	0.010683	0.001377	0.051685
										294	0.012028	0.053266	0.00983	0.007058	0.000827	0.083149
										295	0.012263	0.065757	0.012527	0.00498	0.00089	0.08631
										296	0.023807	0.060914	0.015806	0.007229	0.001538	0.06889
										297	0.024422	0.050431	0.018159	0.007589	0.002224	0.043895
										298	0.018704	0.035518	0.018994	0.00802	0.001973	0.026143
										299	0.018896	0.015509	0.01056	0.008967	0.001722	0.013077
										300	0.020777	0.017751	0.005306	0.009121	0.002005	0.004763
										301	0.023004	0.018656	0.007976	0.014111	0.00345	0.002839
										302	0.021749	0.016418	0.008271	0.025149	0.002123	0.001799
										303	0.018552	0.018982	0.0074	0.023532	0.002059	0.000769
										304	0.015454	0.025187	0.005036	0.019816	0.004385	0.006687
										305	0.017133	0.035475	0.004595	0.014364	0.002706	0.00773
										306	0.024143	0.025442	0.00457	0.009984	0.003183	0.005164
										307	0.029301	0.019834	0.004487	0.007346	0.005453	0.002246
										308	0.019203	0.020535	0.003143	0.006259	0.002436	0.001221
										309	0.017217	0.017353	0.002318	0.006466	0.001237	0.001103
										310	0.019055	0.016117	0.003903	0.008272	0.001206	0.001378
										311	0.023413	0.017319	0.004404	0.010917	0.001331	0.001747
										312	0.020947	0.02365	0.004836	0.011657	0.001097	0.0019
										313	0.018237	0.027289	0.006226	0.01002	0.001371	0.001735
										314	0.020512	0.027656	0.006978	0.007189	0.003445	0.003698
										315	0.020328	0.019145	0.006878	0.004999	0.005007	0.003244
										316	0.018813	0.017806	0.004403	0.004651	0.004935	0.001281
										317	0.015751	0.024788	0.004236	0.005335	0.002232	0.002052
										318	0.014703	0.019204	0.004927	0.006785	0.004077	0.002362
										319	0.013712	0.014916	0.004649	0.007906	0.00388	0.002604
										320	0.01199	0.01241	0.004171	0.008576	0.000939	0.00321
										321	0.012247	0.017394	0.003552	0.00831	0.002699	0.002068
										322	0.012796	0.018503	0.002718	0.00879	0.002574	0.001449
										323	0.013263	0.015263	0.00351	0.009267	0.001426	0.00211
										324	0.010643	0.018495	0.005237	0.009297	0.0035	0.002609
										325	0.009561	0.019693	0.006516	0.00779	0.006076	0.002449
										326	0.011368	0.018624	0.005858	0.007109	0.00726	0.001788
										327	0.009082	0.021681	0.00418	0.008411	0.002483	0.001568
										328	0.008686	0.023232	0.006544	0.009844	0.000789	0.001572
										329	0.011258	0.023165	0.00647	0.010602	0.00083	0.001914
										330	0.012561	0.018225	0.004563	0.010365	0.00259	0.00296
										331	0.01333	0.016768	0.004814	0.013421	0.002553	0.004276
										332	0.013564	0.018905	0.005254	0.017073	0.002343	0.005398
										333	0.014485	0.01768	0.005903	0.021157	0.00228	0.006113
										334	0.013927	0.016927	0.010019	0.013654	0.000942	0.004675
										335	0.011885	0.016665	0.011562	0.010019	0.000761	0.002731
										336	0.013755	0.019972	0.010477	0.010329	0.001771	0.000615
										337	0.01737	0.021731	0.008032	0.011039	0.003719	0.00045
										338	0.022182	0.021964	0.006085	0.014848	0.003806	0.000539
										339	0.018334	0.022031	0.00475	0.020309	0.00278	0.000684
										340	0.015398	0.021181	0.010077	0.01658	0.001963	0.000574
										341	0.013186	0.019453	0.013261	0.017027	0.001686	0.000815
										342	0.010954	0.018585	0.013122	0.019209	0.001892	0.000863
										343	0.013462	0.015746	0.010795	0.014799	0.002835	0.000422
										344	0.018613	0.011176	0.008553	0.016257	0.002083	0.000961
										345	0.017954	0.015752	0.006745	0.018509	0.001713	0.002177
										346	0.015885	0.017806	0.005699	0.010163	0.002656	0.00372
										347	0.013943	0.017476	0.004131	0.009288	0.003138	0.001793
										348	0.018344	0.015672	0.001489	0.012408	0.002931	0.001527
										349	0.017418	0.017075	0.00415	0.018386	0.001991	0.002014
										350	0.0142	0.021312	0.005797	0.019647	0.001174	0.001849
										351	0.013817	0.021245	0.0036	0.018419	0.001605	0.002499
										352	0.017552	0.01942	0.004753	0.014749	0.002714	0.002939
										353	0.021791	0.016221	0.005572	0.016339	0.001772	0.002553
										354	0.020282	0.02013	0.003932	0.01696	0.001374	0.003531
										355	0.016346	0.018418	0.004109	0.012847	0.001645	0.003803
										356	0.012598	0.012019	0.004399	0.017078	0.003342	0.003231
										357	0.012768	0.01389	0.003676	0.020135	0.002868	0.003231
										358	0.015486	0.019014	0.002616	0.018745	0.002216	0.003471
										359	0.01741	0.02661	0.002182	0.014935	0.002593	0.004057
										360	0.014582	0.025107	0.004073	0.011089	0.002807	0.005488
										361	0.015119	0.02099	0.004273	0.007567	0.003126	0.003318
										362	0.014907	0.015267	0.004024	0.010518	0.003629	0.001466
										363	0.010506	0.023785	0.004525	0.013317	0.001637	0.002567
										364	0.013464	0.024449	0.00516	0.015536	0.002136	0.002185
										365	0.014249	0.019378	0.005586	0.014603	0.004972	0.00274
										366	0.006766	0.031571	0.004752	0.012041	0.007046	0.00446
										367	0.013446	0.039474	0.005111	0.008386	0.007954	0.003579
										368	0.019398	0.043448	0.006044	0.013358	0.008481	0.00333
										369	0.019015	0.039941	0.006739	0.013988	0.010681	0.003582
										370	0.018485	0.032682	0.0056	0.0112	0.009359	0.004242
										371	0.016124	0.022629	0.003547	0.007205	0.007905	0.004208
										372	0.010873	0.016583	0.002852	0.007175	0.009854	0.003574
										373	0.009374	0.013052	0.00219	0.008788	0.012522	0.002142
										374	0.00959	0.01178	0.002011	0.005473	0.011829	0.002164
										375	0.011631	0.014652	0.0071	0.003164	0.005103	0.002878
										376	0.009176	0.017187	0.008343	0.00318	0.008916	0.004193
										377	0.008283	0.019056	0.006585	0.010934	0.009743	0.005184
										378	0.009729	0.015081	0.004166	0.012531	0.006141	0.004788
										379	0.011481	0.014116	0.003805	0.010872	0.003187	0.004123
										380	0.011913	0.015035	0.005211	0.00667	0.003022	0.007344
										381	0.010893	0.010325	0.004238	0.00692	0.005263	0.004988
										382	0.009534	0.01195	0.003557	0.008616	0.009662	0.001539
										383	0.008553	0.018227	0.003168	0.01048	0.009857	0.000603
										384	0.007965	0.023204	0.002477	0.007608	0.008371	0.000331
										385	0.008453	0.026066	0.003464	0.005825	0.008308	0.00142
										386	0.009586	0.027353	0.006356	0.008341	0.007955	0.004172
										387	0.011226	0.028455	0.005458	0.008843	0.007254	0.004314
										388	0.012204	0.025817	0.006561	0.008929	0.005997	0.004639
										389	0.012902	0.021177	0.010482	0.00887	0.006762	0.005125
										390	0.013326	0.024384	0.008333	0.010319	0.006485	0.005731
										391	0.013071	0.022064	0.007342	0.010902	0.004348	0.003659
										392	0.010918	0.016566	0.008816	0.010162	0.008945	0.001505
										393	0.008163	0.018938	0.007421	0.012457	0.012153	0.002111
										394	0.010204	0.023062	0.005524	0.012111	0.013444	0.002809
										395	0.01149	0.027395	0.003383	0.008828	0.008887	0.002914
										396	0.011794	0.021683	0.002934	0.009775	0.006239	0.002143
										397	0.009009	0.021107	0.003366	0.008188	0.005343	0.001966
										398	0.00822	0.023835	0.004951	0.004904	0.007292	0.002163
										399	0.00797	0.02457	0.004837	0.010586	0.007498	0.002962
										400	0.005632	0.024446	0.005905	0.01096	0.006127	0.006046
										401	0.006063	0.024325	0.01041	0.007953	0.002325	0.006257
										402	0.007931	0.029402	0.008978	0.008841	0.006047	0.005451
										403	0.010652	0.025058	0.006621	0.006824	0.007909	0.005506
										404	0.012584	0.016458	0.00587	0.004209	0.003792	0.007489
										405	0.013376	0.024542	0.00783	0.007731	0.003232	0.01038
										406	0.011548	0.028853	0.00921	0.010289	0.002833	0.014042
										407	0.012464	0.03	0.006207	0.013864	0.002317	0.007938
										408	0.013612	0.025257	0.00428	0.023245	0.004202	0.004506
										409	0.013081	0.021208	0.002863	0.027228	0.004403	0.003741
										410	0.010869	0.018304	0.001862	0.029054	0.003478	0.00253
										411	0.009168	0.020876	0.002045	0.030504	0.003604	0.001797
										412	0.009636	0.022275	0.002907	0.033171	0.005963	0.002017
										413	0.010191	0.021994	0.00452	0.032604	0.008394	0.004549
										414	0.011518	0.014645	0.003873	0.023667	0.0072	0.003979
										415	0.014324	0.011899	0.002762	0.019243	0.006636	0.003492
										416	0.013377	0.012417	0.005431	0.018163	0.007589	0.0044
										417	0.011211	0.016159	0.004732	0.021537	0.01136	0.005101
										418	0.008064	0.015765	0.002324	0.021397	0.007195	0.005465
										419	0.008809	0.01382	0.001656	0.020405	0.007659	0.005449
										420	0.009859	0.01823	0.002346	0.018896	0.016113	0.004624
										421	0.010603	0.017969	0.003837	0.016023	0.016114	0.004405
										422	0.007942	0.016069	0.004338	0.017034	0.014078	0.004168
										423	0.006386	0.021447	0.004854	0.023011	0.011	0.002681
										424	0.006704	0.023987	0.005357	0.016611	0.015746	0.005482
										425	0.008432	0.025194	0.005412	0.012617	0.022014	0.006707
										426	0.009227	0.028334	0.005423	0.01152	0.026762	0.002963
										427	0.008844	0.020145	0.00537	0.013325	0.019659	0.004765
										428	0.008482	0.008287	0.00423	0.014615	0.017635	0.007239
										429	0.007901	0.013131	0.003104	0.015252	0.017077	0.009499
										430	0.007117	0.015461	0.001991	0.012855	0.015191	0.005095
										431	0.009009	0.016221	0.003883	0.013543	0.015165	0.006035
										432	0.009385	0.015954	0.004903	0.015798	0.015962	0.009133
										433	0.008388	0.016747	0.004931	0.013845	0.017471	0.008308
										434	0.007453	0.01746	0.006346	0.01396	0.018545	0.009575
										435	0.005997	0.014454	0.006255	0.014767	0.020842	0.009991
										436	0.004724	0.01855	0.004197	0.013229	0.024292	0.007486
										437	0.011229	0.024143	0.002629	0.014486	0.016121	0.005205
										438	0.011683	0.017195	0.003409	0.015918	0.011418	0.004567
										439	0.008564	0.018802	0.007497	0.013373	0.009784	0.005806
										440	0.011455	0.023697	0.006979	0.018478	0.011544	0.008889
										441	0.013072	0.022328	0.006534	0.024423	0.014402	0.010591
										442	0.013637	0.019037	0.00709	0.025133	0.018228	0.010801
										443	0.012489	0.016497	0.008463	0.015336	0.023571	0.008213
										444	0.012555	0.022844	0.008689	0.00875	0.032262	0.006616
										445	0.012416	0.021297	0.00652	0.015527	0.036899	0.005314
										446	0.007909	0.017126	0.006895	0.012803	0.030928	0.003938
										447	0.008957	0.019597	0.007381	0.010274	0.040391	0.005003
										448	0.011988	0.029905	0.006991	0.011399	0.044852	0.005526
										449	0.012456	0.039679	0.006958	0.011947	0.039384	0.005035
										450	0.011698	0.028389	0.006698	0.012857	0.038347	0.004705
										451	0.011788	0.029358	0.005641	0.014396	0.034004	0.00408
										452	0.016443	0.033869	0.005524	0.016432	0.027329	0.003424
										453	0.014529	0.027356	0.005614	0.017284	0.030943	0.003644
										454	0.011313	0.026514	0.005475	0.016692	0.029391	0.003422
										455	0.010888	0.028017	0.005336	0.015722	0.026793	0.003696
										456	0.011648	0.028017	0.005142	0.017279	0.034178	0.005513
										457	0.011066	0.025825	0.004752	0.021073	0.026617	0.00494
										458	0.006346	0.025425	0.003736	0.01764	0.017723	0.004413
										459	0.010804	0.037317	0.003268	0.016442	0.020551	0.004421
										460	0.015821	0.035716	0.006299	0.016857	0.026457	0.005908
										461	0.01733	0.029176	0.005779	0.01523	0.034034	0.006129
										462	0.01587	0.027639	0.004495	0.015676	0.043305	0.005445
										463	0.016464	0.026912	0.008444	0.01693	0.03195	0.004949
										464	0.021906	0.027541	0.008511	0.014444	0.024348	0.003866
										465	0.021298	0.032285	0.006906	0.018257	0.023269	0.002823
										466	0.020941	0.03272	0.008881	0.023362	0.040239	0.002492
										467	0.022471	0.030531	0.006895	0.018923	0.042238	0.003893
										468	0.020562	0.02532	0.00324	0.018554	0.033507	0.005565
										469	0.018997	0.027257	0.00819	0.02057	0.027725	0.007189
										470	0.018466	0.031519	0.008217	0.024832	0.019551	0.004411
										471	0.01831	0.032989	0.00532	0.024652	0.013139	0.003029
										472	0.018581	0.035567	0.013107	0.022987	0.016879	0.002919
										473	0.019346	0.037674	0.015167	0.0213	0.017021	0.00358
										474	0.021215	0.036238	0.012551	0.027795	0.014838	0.004966
										475	0.024416	0.036891	0.013636	0.029695	0.009998	0.005835
										476	0.029029	0.037071	0.01154	0.01768	0.011474	0.004349
										477	0.023408	0.032361	0.006423	0.02363	0.01237	0.00332
										478	0.02294	0.035439	0.013006	0.028904	0.011239	0.002362
										479	0.027252	0.038206	0.017083	0.027602	0.012342	0.001371
										480	0.020088	0.028685	0.018417	0.023222	0.018971	0.004592
										481	0.017969	0.031593	0.01578	0.019322	0.029638	0.00517
										482	0.020348	0.038876	0.013262	0.01657	0.028663	0.003919
										483	0.025981	0.044521	0.011065	0.018853	0.036358	0.007443
										484	0.026132	0.036427	0.007934	0.020928	0.046407	0.007066
										485	0.02239	0.026608	0.005769	0.022437	0.042855	0.005144
										486	0.021114	0.028779	0.005046	0.023475	0.04438	0.004263
										487	0.01806	0.023843	0.005576	0.025171	0.044147	0.00374
										488	0.014958	0.019546	0.007304	0.027388	0.034153	0.003026
										489	0.020336	0.026193	0.010725	0.027565	0.034108	0.00187
										490	0.02005	0.02498	0.01637	0.032476	0.033676	0.00176
										491	0.016984	0.021958	0.019723	0.039964	0.029056	0.001705
										492	0.016813	0.022359	0.018277	0.037182	0.019874	0.001905
										493	0.018394	0.018916	0.020605	0.036952	0.017465	0.004768
										494	0.020551	0.018385	0.021445	0.037732	0.022962	0.005752
										495	0.021295	0.031412	0.017607	0.034951	0.028368	0.005678
										496	0.01753	0.030706	0.021702	0.034883	0.027578	0.005347
										497	0.014701	0.026975	0.024194	0.037562	0.023157	0.004842
										498	0.022758	0.028645	0.018077	0.046144	0.02542	0.004392
										499	0.026629	0.030315	0.018523	0.048772	0.035276	0.004116
										500	0.027401	0.031162	0.021675	0.049051	0.043063	0.003585
										501	0.023404	0.029526	0.027098	0.049465	0.03112	0.004328
										502	0.025658	0.032179	0.023916	0.050601	0.021809	0.006259
										503	0.029288	0.036745	0.020025	0.048842	0.017409	0.006754
										504	0.031265	0.042758	0.023946	0.039313	0.02162	0.0089
										505	0.029686	0.037009	0.019651	0.031104	0.015655	0.012448
										506	0.026736	0.030289	0.013679	0.03116	0.013717	0.017789
										507	0.022824	0.031725	0.014652	0.046993	0.019186	0.015107
										508	0.025399	0.034584	0.016248	0.038784	0.016378	0.011043
										509	0.028161	0.037514	0.018256	0.031049	0.015821	0.008786
										510	0.028479	0.039385	0.02087	0.030368	0.017496	0.010498
										511	0.030771	0.037782	0.015161	0.028639	0.019288	0.010152
										512	0.033751	0.037801	0.006275	0.027816	0.024873	0.007251
										513	0.037322	0.045217	0.006553	0.028319	0.029987	0.005709
										514	0.038342	0.039299	0.009019	0.027293	0.022224	0.004985
										515	0.039801	0.033738	0.012782	0.024431	0.022193	0.005561
										516	0.042437	0.039884	0.015869	0.01967	0.026592	0.00958
										517	0.048142	0.044248	0.018696	0.015497	0.034952	0.0116
										518	0.053945	0.050743	0.021316	0.020725	0.031788	0.011472
										519	0.059494	0.064205	0.023624	0.033086	0.025237	0.008224
										520	0.055339	0.068258	0.022271	0.02483	0.017098	0.007781
										521	0.048847	0.067792	0.017888	0.025089	0.016379	0.007442
										522	0.04028	0.062614	0.012271	0.031489	0.015894	0.006836
										523	0.034909	0.055371	0.009151	0.037437	0.015055	0.006231
										524	0.028308	0.045071	0.008356	0.034839	0.015747	0.005922
										525	0.020443	0.028536	0.011359	0.027697	0.016673	0.006101
										526	0.023908	0.028881	0.012005	0.023465	0.017968	0.007697
										527	0.026028	0.033665	0.01017	0.023197	0.020608	0.005313
										528	0.026661	0.038142	0.015329	0.024254	0.024544	0.003405
										529	0.020836	0.030692	0.016886	0.023041	0.026034	0.005772
										530	0.018369	0.022999	0.013883	0.025927	0.017046	0.007899
										531	0.018797	0.022264	0.017096	0.02798	0.012304	0.009734
										532	0.021816	0.024294	0.017933	0.02286	0.011011	0.011235
										533	0.023715	0.02527	0.014985	0.024337	0.014311	0.011786
										534	0.024629	0.022096	0.012012	0.025895	0.013368	0.011072
										535	0.023842	0.021544	0.010408	0.023113	0.01101	0.009713
										536	0.023148	0.024578	0.010937	0.027368	0.007553	0.00985
										537	0.023199	0.034365	0.015872	0.027807	0.015761	0.009335
										538	0.027769	0.03439	0.022604	0.018219	0.019875	0.010125
										539	0.024572	0.036662	0.031419	0.019179	0.020209	0.014777
										540	0.018529	0.049322	0.040961	0.020933	0.022283	0.016411
										541	0.019528	0.055302	0.046263	0.021525	0.020889	0.016181
										542	0.022953	0.055013	0.042593	0.01569	0.019731	0.014116
										543	0.025905	0.044357	0.037545	0.014561	0.029253	0.019031
										544	0.022164	0.055919	0.030623	0.020006	0.026778	0.019584
										545	0.020823	0.070568	0.02	0.030957	0.020333	0.016649
										546	0.020164	0.080923	0.019767	0.03896	0.015273	0.013235
										547	0.018484	0.081298	0.026194	0.043414	0.014841	0.012715
										548	0.019406	0.076235	0.043018	0.029062	0.015731	0.012237
										549	0.019813	0.064343	0.061132	0.020612	0.017208	0.008521
										550	0.016114	0.046209	0.076038	0.017894	0.012944	0.007342
										551	0.017951	0.032995	0.078902	0.025617	0.014472	0.006016
										552	0.022917	0.032761	0.063742	0.025665	0.022541	0.003758
										553	0.031591	0.039272	0.041568	0.020759	0.020341	0.004939
										554	0.048484	0.049668	0.019905	0.018628	0.017015	0.005186
										555	0.067213	0.065101	0.013772	0.017255	0.013782	0.004481
										556	0.08558	0.06772	0.016258	0.016856	0.016799	0.002994
										557	0.080657	0.071026	0.025935	0.019253	0.019305	0.002521
										558	0.068397	0.080847	0.027792	0.026356	0.019405	0.002715
										559	0.051071	0.07622	0.025647	0.031699	0.012177	0.003485
										560	0.036655	0.065997	0.024535	0.022643	0.007736	0.003219
										561	0.026017	0.050364	0.031258	0.024254	0.005677	0.003193
										562	0.020766	0.045323	0.040683	0.028795	0.006872	0.003909
										563	0.016297	0.040093	0.032257	0.030867	0.011543	0.003518
										564	0.016124	0.030673	0.025681	0.029938	0.01371	0.003657
										565	0.021928	0.029755	0.020807	0.028578	0.011887	0.004193
										566	0.020308	0.029448	0.02114	0.028075	0.035612	0.003532
										567	0.020943	0.027377	0.023998	0.029399	0.050358	0.004442
										568	0.025109	0.026215	0.028689	0.028994	0.055618	0.006212
										569	0.022563	0.02639	0.029273	0.024851	0.049552	0.008194
										570	0.021908	0.028728	0.025915	0.024916	0.039833	0.011366
										571	0.023652	0.030895	0.019066	0.024584	0.030439	0.01341
										572	0.02569	0.030625	0.020401	0.022868	0.032482	0.013025
										573	0.028345	0.026015	0.016744	0.025648	0.031365	0.007628
										574	0.031394	0.026571	0.007957	0.025783	0.027275	0.005491
										575	0.025526	0.027503	0.01311	0.02238	0.018538	0.006777
										576	0.022095	0.027604	0.014509	0.017061	0.013604	0.0073
										577	0.020667	0.023809	0.011144	0.014157	0.012027	0.007166
										578	0.017669	0.019852	0.011539	0.013569	0.014667	0.006506
										579	0.0157	0.016679	0.01147	0.010225	0.015585	0.00524
										580	0.014459	0.01771	0.010496	0.011733	0.014624	0.006687
										581	0.012674	0.01865	0.013715	0.016769	0.011829	0.007884
										582	0.013427	0.01835	0.015185	0.017331	0.011201	0.007223
										583	0.016077	0.022946	0.013405	0.020248	0.010936	0.006006
										584	0.020286	0.027819	0.009762	0.023765	0.011732	0.006595
										585	0.019729	0.031961	0.010374	0.020747	0.017891	0.008926
										586	0.016964	0.029892	0.0188	0.019637	0.018074	0.007935
										587	0.017517	0.030652	0.01222	0.020094	0.018216	0.005979
										588	0.015632	0.037467	0.007491	0.023113	0.027707	0.004133
										589	0.012662	0.037067	0.011745	0.017968	0.021032	0.005124
										590	0.010409	0.034364	0.012133	0.011147	0.014503	0.00561
										591	0.010383	0.02952	0.014533	0.010614	0.017582	0.007002
										592	0.011077	0.029146	0.02357	0.009793	0.025693	0.010526
										593	0.010779	0.029865	0.034793	0.008981	0.03213	0.011767
										594	0.013349	0.031402	0.040453	0.008449	0.03543	0.010184
										595	0.015434	0.042606	0.029469	0.012212	0.033372	0.005877
										596	0.012564	0.048163	0.025951	0.016208	0.030321	0.006042
										597	0.015386	0.043152	0.025389	0.018397	0.027117	0.005505
										598	0.018446	0.040145	0.026502	0.02199	0.031171	0.004955
										599	0.017235	0.039164	0.0336	0.022589	0.028851	0.006469
										600	0.01691	0.040901	0.041145	0.017677	0.025789	0.00583
										601	0.017979	0.033473	0.041562	0.015519	0.036411	0.005732
										602	0.021699	0.034162	0.037794	0.016019	0.039118	0.008429
										603	0.018092	0.048459	0.03163	0.019747	0.039294	0.009427
										604	0.014774	0.040771	0.023009	0.02113	0.040489	0.01011
										605	0.015263	0.032623	0.016531	0.021264	0.031664	0.010783
										606	0.017776	0.027212	0.011628	0.02014	0.024387	0.016068
										607	0.019433	0.029812	0.009515	0.021247	0.022973	0.020235
										608	0.018987	0.029542	0.011114	0.021163	0.016325	0.022922
										609	0.018316	0.023997	0.014012	0.019781	0.012396	0.021876
										610	0.018584	0.022478	0.00959	0.014484	0.011978	0.02265
										611	0.020327	0.023326	0.009304	0.011095	0.016252	0.022126
										612	0.028257	0.026967	0.011734	0.00979	0.015235	0.016869
										613	0.034799	0.033336	0.012985	0.014732	0.011315	0.011682
										614	0.038689	0.034579	0.012953	0.018056	0.013514	0.00796
										615	0.056039	0.028399	0.012155	0.019752	0.01657	0.006156
										616	0.056175	0.069159	0.016048	0.017651	0.018199	0.012872
										617	0.035087	0.090416	0.018332	0.016649	0.013737	0.018114
										618	0.024048	0.079827	0.01922	0.01832	0.013004	0.021428
										619	0.020192	0.053701	0.021834	0.029151	0.016064	0.019694
										620	0.023471	0.04038	0.022144	0.025487	0.024675	0.022616
										621	0.017008	0.045758	0.020141	0.018769	0.027306	0.025398
										622	0.013173	0.040562	0.028147	0.021137	0.030619	0.022783
										623	0.011868	0.039127	0.041079	0.021005	0.035898	0.024728
										624	0.013632	0.043637	0.059433	0.018654	0.027827	0.024214
										625	0.015526	0.051646	0.05236	0.012706	0.023839	0.019039
										626	0.017549	0.058069	0.044341	0.014686	0.024316	0.026769
										627	0.019908	0.062145	0.036777	0.016113	0.031952	0.030837
										628	0.018494	0.059657	0.038164	0.01271	0.039649	0.032289
										629	0.014389	0.058598	0.040647	0.014335	0.045378	0.037712
										630	0.010265	0.059867	0.043595	0.013633	0.042079	0.046018
										631	0.007828	0.049589	0.0381	0.007832	0.033629	0.054447
										632	0.007441	0.039766	0.034938	0.01207	0.033289	0.059484
										633	0.01367	0.031348	0.037525	0.01453	0.058462	0.054555
										634	0.017989	0.040683	0.032614	0.013287	0.064059	0.049745
										635	0.020608	0.044098	0.028823	0.018633	0.064758	0.048314
										636	0.019843	0.039154	0.029657	0.024556	0.063941	0.050094
										637	0.017911	0.034178	0.033516	0.030686	0.052699	0.041445
										638	0.016192	0.029475	0.040873	0.017813	0.045206	0.025095
										639	0.01768	0.025099	0.054638	0.013547	0.042716	0.02237
										640	0.017631	0.031636	0.043116	0.017523	0.044759	0.022948
										641	0.017242	0.034576	0.029442	0.031698	0.046363	0.023965
										642	0.017858	0.032739	0.027524	0.0463	0.048751	0.021212
										643	0.024185	0.035114	0.029537	0.060736	0.058368	0.022864
										644	0.029661	0.03936	0.03114	0.070945	0.069871	0.028756
										645	0.026812	0.045574	0.027636	0.081303	0.077137	0.039932
										646	0.025357	0.044745	0.029196	0.089016	0.067489	0.035465
										647	0.026004	0.041999	0.034853	0.081322	0.065512	0.035633
										648	0.030851	0.037355	0.048702	0.066297	0.064269	0.04033
										649	0.031467	0.045174	0.054764	0.048078	0.060215	0.03733
										650	0.029515	0.052361	0.053783	0.03121	0.063871	0.034347
										651	0.024285	0.058441	0.036236	0.031027	0.070171	0.030628
										652	0.022848	0.048838	0.030315	0.035464	0.078593	0.024269
										653	0.023162	0.049426	0.029755	0.034606	0.076022	0.015476
										654	0.02533	0.061552	0.026306	0.03009	0.071081	0.011713
										655	0.02748	0.054943	0.024583	0.024769	0.064458	0.018127
										656	0.02966	0.046204	0.024272	0.020094	0.060373	0.025281
										657	0.031892	0.035581	0.027081	0.022588	0.072634	0.026899
										658	0.026067	0.049801	0.03141	0.023103	0.089876	0.02403
										659	0.019499	0.062038	0.036988	0.016918	0.086985	0.038646
										660	0.013207	0.071793	0.045136	0.018457	0.077275	0.040434
										661	0.01133	0.080158	0.038061	0.020379	0.063748	0.036125
										662	0.01075	0.080066	0.020798	0.021119	0.04684	0.037089
										663	0.011366	0.071247	0.027444	0.033686	0.034514	0.035549
										664	0.017035	0.062893	0.031984	0.042342	0.026477	0.029366
										665	0.020848	0.064505	0.034478	0.044769	0.023869	0.015603
										666	0.022358	0.07623	0.026302	0.041211	0.03569	0.014416
										667	0.027633	0.076348	0.022946	0.040888	0.048225	0.014446
										668	0.03023	0.095366	0.024309	0.04404	0.059859	0.014826
										669	0.030214	0.133136	0.030019	0.042708	0.05527	0.02369
										670	0.032425	0.134172	0.035327	0.044576	0.048151	0.029948
										671	0.032389	0.129081	0.040138	0.049371	0.040321	0.033942
										672	0.030327	0.117946	0.035576	0.057154	0.039599	0.035125
										673	0.026713	0.100944	0.032612	0.063873	0.044633	0.030367
										674	0.026031	0.08503	0.032195	0.071019	0.049689	0.02547
										675	0.027663	0.070274	0.035073	0.087266	0.046075	0.024424
										676	0.030171	0.064462	0.03498	0.104721	0.054185	0.02257
										677	0.036104	0.069111	0.030224	0.119481	0.05654	0.026471
										678	0.042996	0.083533	0.036306	0.116818	0.040952	0.037155
										679	0.039552	0.091449	0.043296	0.111756	0.040809	0.043046
										680	0.039068	0.106939	0.049665	0.10652	0.039871	0.039159
										681	0.039579	0.12887	0.060562	0.104714	0.035252	0.030008
										682	0.035731	0.123592	0.072273	0.104019	0.052249	0.027779
										683	0.035356	0.120813	0.084147	0.096792	0.069512	0.027609
										684	0.037022	0.120342	0.100429	0.069832	0.085497	0.026572
										685	0.039913	0.12101	0.120593	0.053527	0.088357	0.02181
										686	0.039772	0.111947	0.147261	0.046061	0.073915	0.020669
										687	0.03984	0.095552	0.154308	0.051832	0.053626	0.02154
										688	0.045835	0.123679	0.152304	0.057208	0.051615	0.024279
										689	0.050507	0.132657	0.139902	0.058613	0.036771	0.025407
										690	0.056022	0.124964	0.098689	0.05302	0.026727	0.021069
										691	0.065822	0.121657	0.055388	0.054994	0.040429	0.014655
										692	0.065882	0.132012	0.032141	0.062852	0.043772	0.0195
										693	0.064175	0.152884	0.032789	0.077826	0.041277	0.016158
										694	0.066237	0.142329	0.041803	0.106432	0.032729	0.012066
										695	0.058524	0.137811	0.04984	0.115415	0.032728	0.014323
										696	0.052504	0.138596	0.046467	0.099672	0.037485	0.019067
										697	0.056564	0.143406	0.040926	0.070771	0.047266	0.023176
										698	0.048949	0.143075	0.046988	0.06003	0.07379	0.025819
										699	0.042488	0.138831	0.049506	0.067775	0.092061	0.024973
										700	0.043573	0.141837	0.051688	0.086508	0.099138	0.027876
										701	0.047326	0.154787	0.061532	0.085083	0.072017	0.032377
										702	0.051301	0.175224	0.062849	0.067597	0.055445	0.027367
										703	0.05483	0.184076	0.060292	0.053363	0.048156	0.028241
										704	0.046503	0.197542	0.064491	0.059037	0.05529	0.034885
										705	0.046049	0.212829	0.077349	0.075283	0.061585	0.05041
										706	0.060122	0.196962	0.094722	0.073182	0.068978	0.040527
										707	0.068754	0.186924	0.101201	0.083621	0.079003	0.029713
										708	0.077053	0.180089	0.102115	0.098107	0.080319	0.025034
										709	0.08562	0.152029	0.098025	0.099764	0.074692	0.039766
										710	0.100095	0.14361	0.079755	0.085273	0.061524	0.048455
										711	0.097626	0.14861	0.059643	0.069131	0.066258	0.051067
										712	0.074645	0.128401	0.038644	0.071499	0.069975	0.050048
										713	0.065279	0.123528	0.041286	0.091849	0.071483	0.045448
										714	0.05875	0.130184	0.052886	0.109074	0.061238	0.042034
										715	0.054823	0.135195	0.073047	0.101646	0.070991	0.047457
										716	0.057119	0.141162	0.068488	0.087291	0.088695	0.042333
										717	0.058276	0.146869	0.078831	0.076883	0.091021	0.031415
										718	0.058525	0.140555	0.105471	0.078599	0.078546	0.015036
										719	0.062628	0.143015	0.11732	0.100469	0.061801	0.014577
										720	0.063836	0.150605	0.111108	0.109503	0.047659	0.018525
										721	0.062151	0.143189	0.0833	0.090297	0.046206	0.02566
										722	0.052967	0.151338	0.063369	0.087249	0.046066	0.031468
										723	0.054792	0.168618	0.053495	0.092533	0.044055	0.033993
										724	0.068057	0.163407	0.056943	0.106738	0.041573	0.034016
										725	0.113976	0.156551	0.067923	0.110484	0.040373	0.031319
										726	0.117574	0.14955	0.078557	0.11279	0.040414	0.037611
										727	0.09871	0.153025	0.087288	0.114181	0.036549	0.044963
										728	0.108	0.17408	0.079897	0.103986	0.048255	0.050165
										729	0.107625	0.207056	0.069377	0.095641	0.069294	0.048862
										730	0.1048	0.237487	0.057615	0.089963	0.079885	0.045744
										731	0.117002	0.252152	0.045526	0.104346	0.073324	0.041573
										732	0.138935	0.253548	0.040257	0.108375	0.062871	0.041132
										733	0.166414	0.231368	0.0496	0.105582	0.065134	0.041203
										734	0.197621	0.251676	0.046106	0.114845	0.076074	0.041975
										735	0.221972	0.294955	0.042302	0.111373	0.086585	0.044315
										736	0.2331	0.290746	0.045444	0.104361	0.091613	0.041323
										737	0.208015	0.284519	0.045666	0.125609	0.104695	0.040979
										738	0.233387	0.271284	0.048528	0.132033	0.108358	0.048494
										739	0.259093	0.210321	0.061542	0.135857	0.098553	0.041468
										740	0.233328	0.177215	0.079086	0.161456	0.102643	0.036246
										741	0.225741	0.163617	0.096757	0.150322	0.113854	0.034396
										742	0.217845	0.162849	0.109382	0.137336	0.128934	0.032937
										743	0.195544	0.164006	0.131091	0.167077	0.121894	0.040207
										744	0.153971	0.163219	0.151605	0.244698	0.106064	0.053128
										745	0.120383	0.138233	0.151466	0.315429	0.08654	0.067497
										746	0.114388	0.119767	0.124828	0.330404	0.072712	0.062616
										747	0.112515	0.106169	0.088626	0.276133	0.065812	0.046963
										748	0.106085	0.098687	0.068549	0.225065	0.062718	0.021748
										749	0.089545	0.100349	0.057331	0.213494	0.062938	0.012926
										750	0.092845	0.10798	0.050539	0.194267	0.056815	0.015128
										751	0.095597	0.118536	0.040695	0.172248	0.065671	0.027303
										752	0.092302	0.131876	0.038147	0.147774	0.100146	0.025018
										753	0.08798	0.144316	0.040202	0.144469	0.104626	0.034455
										754	0.086301	0.139472	0.042232	0.151884	0.108978	0.047734
										755	0.088597	0.142873	0.041741	0.170587	0.115228	0.042366
										756	0.079636	0.150729	0.04026	0.165146	0.119753	0.034449
										757	0.071292	0.156241	0.050633	0.154227	0.105288	0.028043
										758	0.064872	0.184452	0.067925	0.138572	0.080882	0.026997
										759	0.069498	0.216546	0.090462	0.112915	0.077582	0.025395
										760	0.065069	0.191593	0.100473	0.095403	0.074801	0.023839
										761	0.049975	0.166383	0.110843	0.08589	0.072256	0.022454
										762	0.048052	0.146344	0.121573	0.089145	0.06971	0.022289
										763	0.048515	0.158302	0.147768	0.08882	0.068849	0.031746
										764	0.051476	0.169486	0.165712	0.087549	0.063392	0.044177
										765	0.069865	0.178318	0.174917	0.101399	0.048056	0.035258
										766	0.102889	0.17598	0.150578	0.128673	0.03914	0.035721
										767	0.145359	0.178304	0.135409	0.15285	0.037175	0.036921
										768	0.126227	0.186435	0.132545	0.113403	0.043083	0.031112
										769	0.0982	0.212992	0.102221	0.127734	0.043587	0.039289
										770	0.066486	0.201205	0.074439	0.154756	0.044247	0.048358
										771	0.06993	0.164692	0.052637	0.127589	0.045182	0.05557
										772	0.081488	0.104297	0.053231	0.103137	0.047004	0.04774
										773	0.097374	0.077496	0.057626	0.084802	0.044873	0.053965
										774	0.104283	0.069686	0.064328	0.081961	0.0421	0.074315
										775	0.112902	0.069954	0.074578	0.088225	0.046186	0.115936
										776	0.12005	0.071305	0.073081	0.100802	0.044676	0.13436
										777	0.112461	0.07457	0.049611	0.121991	0.042259	0.136544
										778	0.108336	0.084725	0.06298	0.134592	0.042479	0.121459
										779	0.104898	0.095393	0.073372	0.139998	0.052691	0.119917
										780	0.096288	0.102077	0.063361	0.135293	0.061545	0.11269
										781	0.086592	0.08798	0.057113	0.143207	0.065254	0.093587
										782	0.078744	0.082455	0.053252	0.159846	0.072651	0.064301
										783	0.079871	0.086771	0.053002	0.187013	0.085806	0.040999
										784	0.083546	0.117937	0.050089	0.189911	0.104027	0.026942
										785	0.089829	0.126336	0.047813	0.184204	0.105127	0.044201
										786	0.10133	0.127067	0.049454	0.170384	0.095542	0.0477
										787	0.111582	0.1427	0.040382	0.139869	0.078302	0.043147
										788	0.117737	0.162517	0.033055	0.126733	0.059792	0.03354
										789	0.113868	0.179524	0.043677	0.132116	0.046264	0.024884
										790	0.106213	0.175215	0.050186	0.12744	0.036833	0.019168
										791	0.101512	0.151864	0.055682	0.115984	0.033282	0.017709
										792	0.106126	0.123976	0.063719	0.100674	0.041617	0.023305
										793	0.094975	0.114355	0.072876	0.114021	0.054869	0.027653
										794	0.076897	0.122589	0.079183	0.115137	0.071526	0.030741
										795	0.052024	0.136978	0.068672	0.106822	0.068805	0.034898
										796	0.049892	0.143459	0.067483	0.09173	0.067635	0.04683
										797	0.057118	0.137743	0.070117	0.084305	0.071501	0.058823
										798	0.073572	0.125819	0.065223	0.083911	0.08305	0.058327
										799	0.08366	0.110487	0.05933	0.097346	0.085091	0.053053
										800	0.09767	0.098468	0.054221	0.105224	0.079226	0.043812
										801	0.119078	0.094039	0.061256	0.112022	0.07602	0.029856
										802	0.105089	0.114115	0.056142	0.124362	0.078548	0.018983
										803	0.092025	0.129165	0.043	0.135769	0.080785	0.011883
										804	0.084989	0.136658	0.03652	0.147012	0.068057	0.00869
										805	0.090029	0.12313	0.031107	0.158761	0.075056	0.010975
										806	0.095862	0.130119	0.026677	0.174888	0.084627	0.013973
										807	0.101729	0.147317	0.025426	0.186529	0.083558	0.016947
										808	0.126871	0.171034	0.022616	0.185316	0.082648	0.018434
										809	0.133529	0.177599	0.018448	0.130182	0.086492	0.027052
										810	0.120159	0.178514	0.021896	0.091351	0.097712	0.031807
										811	0.107277	0.184126	0.030061	0.101768	0.087207	0.025944
										812	0.09941	0.158928	0.043103	0.104551	0.074202	0.029681
										813	0.096264	0.129278	0.040706	0.100692	0.060763	0.028461
										814	0.094946	0.127207	0.0418	0.088588	0.064659	0.021715
										815	0.09433	0.119041	0.047445	0.102	0.084392	0.021825
										816	0.094087	0.115593	0.063825	0.10967	0.114596	0.022368
										817	0.090983	0.136738	0.076119	0.108072	0.141749	0.023237
										818	0.096945	0.140503	0.082098	0.117383	0.197866	0.024393
										819	0.106172	0.13791	0.090917	0.114443	0.244114	0.029853
										820	0.084786	0.136039	0.090737	0.099752	0.218438	0.042005
										821	0.09522	0.137778	0.076415	0.108453	0.210586	0.064825
										822	0.118014	0.1326	0.084513	0.121849	0.209329	0.083266
										823	0.087593	0.100165	0.090631	0.136892	0.211718	0.084335
										824	0.07193	0.098183	0.087961	0.125173	0.227997	0.066568
										825	0.066151	0.104306	0.091991	0.120446	0.243436	0.049143
										826	0.069382	0.101099	0.094668	0.127764	0.255661	0.038455
										827	0.08519	0.092288	0.092221	0.187158	0.226764	0.034188
										828	0.100612	0.09381	0.074404	0.184146	0.198577	0.039639
										829	0.088559	0.134029	0.061612	0.149763	0.174689	0.031091
										830	0.086918	0.179191	0.068564	0.127153	0.184495	0.021256
										831	0.087439	0.216464	0.081733	0.112096	0.177082	0.018834
										832	0.080296	0.224314	0.087401	0.106704	0.163776	0.016875
										833	0.074516	0.219769	0.067991	0.123749	0.166196	0.013688
										834	0.069727	0.201976	0.060846	0.124968	0.160714	0.009063
										835	0.066432	0.157014	0.063031	0.119651	0.153415	0.009118
										836	0.056327	0.147601	0.082302	0.111247	0.148387	0.010557
										837	0.050442	0.145011	0.084796	0.116529	0.132644	0.013557
										838	0.060391	0.128208	0.084654	0.123582	0.127056	0.019723
										839	0.051034	0.105134	0.099504	0.126867	0.140349	0.018362
										840	0.041977	0.088122	0.099908	0.110384	0.168089	0.018061
										841	0.044103	0.094168	0.093194	0.096293	0.182957	0.026842
										842	0.052356	0.100164	0.083628	0.092624	0.184924	0.031424
										843	0.061093	0.108602	0.073039	0.110419	0.216634	0.033382
										844	0.068384	0.123901	0.063066	0.120442	0.217712	0.032832
										845	0.083224	0.12231	0.06009	0.115944	0.194716	0.045081
										846	0.093875	0.118046	0.065147	0.137314	0.153767	0.059035
										847	0.095618	0.120551	0.073414	0.147406	0.122956	0.071532
										848	0.097342	0.147151	0.068603	0.142671	0.109068	0.067541
										849	0.093896	0.170212	0.065327	0.11518	0.133989	0.078748
										850	0.082969	0.164734	0.063004	0.113813	0.141204	0.090939
										851	0.087524	0.169017	0.0595	0.138139	0.133329	0.0897
										852	0.098753	0.174641	0.060617	0.18173	0.10539	0.089325
										853	0.116866	0.176378	0.065161	0.210931	0.119248	0.089759
										854	0.093137	0.173193	0.065856	0.222972	0.13431	0.091108
										855	0.079723	0.1713	0.072472	0.172368	0.144555	0.087003
										856	0.080085	0.176243	0.084389	0.162445	0.203066	0.090969
										857	0.085081	0.138729	0.099461	0.170935	0.233133	0.099673
										858	0.08413	0.102132	0.102658	0.132168	0.238144	0.095489
										859	0.077859	0.096954	0.093871	0.137872	0.235316	0.115115
										860	0.106728	0.097045	0.08937	0.163798	0.243682	0.144113
										861	0.139453	0.101784	0.084715	0.177973	0.246343	0.169631
										862	0.174448	0.114411	0.079793	0.191267	0.199171	0.20652
										863	0.188075	0.132389	0.079467	0.195042	0.172807	0.212581
										864	0.198161	0.15204	0.083318	0.168733	0.161183	0.168538
										865	0.209929	0.172349	0.0923	0.182475	0.167751	0.135701
										866	0.27228	0.179231	0.11517	0.196981	0.160565	0.123571
										867	0.307956	0.185139	0.133487	0.180852	0.151898	0.12767
										868	0.323982	0.19673	0.143192	0.153244	0.14489	0.119963
										869	0.327617	0.215074	0.125568	0.13282	0.143485	0.135869
										870	0.318429	0.234422	0.117067	0.132494	0.129374	0.163691
										871	0.301577	0.25226	0.130053	0.134624	0.103305	0.192953
										872	0.284507	0.270151	0.140236	0.124171	0.108648	0.219045
										873	0.2637	0.312321	0.151513	0.092476	0.114214	0.229735
										874	0.244187	0.408793	0.165862	0.085795	0.120431	0.216467
										875	0.240041	0.461778	0.221035	0.098732	0.129608	0.165029
										876	0.228494	0.494891	0.258435	0.134303	0.149075	0.129298
										877	0.212768	0.506649	0.235689	0.187777	0.16248	0.115422
										878	0.193763	0.518081	0.204236	0.231763	0.142995	0.157429
										879	0.18349	0.509425	0.172264	0.26429	0.137732	0.165318
										880	0.177431	0.457815	0.145012	0.239609	0.149457	0.159977
										881	0.174051	0.393221	0.15386	0.205093	0.186541	0.171181
										882	0.15726	0.340669	0.186246	0.164734	0.188391	0.164349
										883	0.137813	0.319424	0.256239	0.181573	0.17998	0.153393
										884	0.123208	0.252096	0.357076	0.188566	0.163952	0.143511
										885	0.129712	0.195327	0.448998	0.190815	0.15686	0.147245
										886	0.143599	0.180496	0.464209	0.216236	0.142825	0.16672
										887	0.161095	0.179623	0.487111	0.226714	0.123521	0.200949
										888	0.166335	0.179413	0.515337	0.236745	0.109882	0.234587
										889	0.166438	0.174737	0.552488	0.296287	0.09519	0.283336
										890	0.161782	0.192169	0.560799	0.324702	0.086059	0.338684
										891	0.143682	0.20466	0.551336	0.336506	0.102369	0.386085
										892	0.134056	0.198647	0.523778	0.342484	0.106676	0.368598
										893	0.143771	0.18166	0.519655	0.32841	0.105263	0.354416
										894	0.148342	0.167441	0.523189	0.299408	0.100015	0.383044
										895	0.149814	0.162698	0.480448	0.24836	0.107827	0.351852
										896	0.147603	0.16637	0.38822	0.19722	0.118785	0.311855
										897	0.165155	0.172559	0.269711	0.156048	0.130885	0.267635
										898	0.192833	0.180543	0.225802	0.138884	0.136659	0.203855
										899	0.231566	0.187706	0.219296	0.15325	0.145984	0.15221
										900	0.267624	0.202842	0.240256	0.176827	0.159932	0.116231
										901	0.289812	0.233106	0.242175	0.204645	0.187085	0.115845
										902	0.295573	0.330048	0.228543	0.233258	0.20629	0.105609
										903	0.313814	0.427112	0.202097	0.254417	0.221286	0.095874
										904	0.344862	0.503174	0.208799	0.263798	0.243348	0.093865
										905	0.389079	0.521527	0.251533	0.274453	0.260712	0.091708
										906	0.447158	0.502063	0.329756	0.277292	0.274021	0.086879
										907	0.490198	0.432248	0.331475	0.270042	0.281186	0.079316
										908	0.518654	0.402362	0.342844	0.289652	0.311797	0.0835
										909	0.53109	0.40264	0.366064	0.323618	0.329683	0.099322
										910	0.52342	0.444529	0.439315	0.371584	0.312021	0.122022
										911	0.498795	0.446049	0.483567	0.421449	0.333365	0.140163
										912	0.468459	0.465247	0.487988	0.480431	0.337752	0.181574
										913	0.447067	0.525742	0.467919	0.547724	0.315376	0.224403
										914	0.428637	0.556435	0.426759	0.622151	0.310741	0.251489
										915	0.376639	0.590507	0.357934	0.595909	0.315394	0.284133
										916	0.338908	0.637841	0.348608	0.511969	0.329014	0.295498
										917	0.315162	0.737146	0.370568	0.534815	0.35491	0.278949
										918	0.325239	0.793972	0.432468	0.564165	0.334466	0.252523
										919	0.348497	0.767983	0.483219	0.59387	0.296404	0.254
										920	0.375547	0.743139	0.500197	0.605766	0.290307	0.266013
										921	0.38354	0.729953	0.456344	0.570223	0.285734	0.222906
										922	0.367708	0.735465	0.403252	0.52389	0.278823	0.206432
										923	0.342793	0.664666	0.356549	0.519895	0.265121	0.206244
										924	0.328571	0.601368	0.328102	0.534524	0.231289	0.220531
										925	0.321087	0.56616	0.335875	0.553265	0.20702	0.252381
										926	0.307792	0.545035	0.348647	0.564244	0.202903	0.306488
										927	0.263851	0.528636	0.350538	0.500001	0.217701	0.386785
										928	0.247147	0.516845	0.38467	0.446103	0.264708	0.447459
										929	0.248742	0.491733	0.429106	0.463474	0.343196	0.490568
										930	0.275698	0.471753	0.474711	0.485586	0.419407	0.507115
										931	0.322522	0.462133	0.493066	0.509299	0.476871	0.437196
										932	0.37244	0.476262	0.516764	0.534157	0.521424	0.361657
										933	0.414851	0.489787	0.595572	0.51415	0.564637	0.298405
										934	0.435108	0.498272	0.617649	0.530765	0.598456	0.275337
										935	0.455681	0.597113	0.625363	0.610726	0.612321	0.278249
										936	0.489227	0.681224	0.676335	0.764147	0.577752	0.28593
										937	0.551679	0.728858	0.664762	0.870772	0.564266	0.29317
										938	0.607375	0.772198	0.617447	0.913712	0.558044	0.328595
										939	0.638901	0.789125	0.543478	0.910104	0.555373	0.381446
										940	0.618138	0.768347	0.469048	0.892625	0.606035	0.446719
										941	0.578162	0.730668	0.399926	0.863558	0.626999	0.499131
										942	0.520381	0.711756	0.371117	0.877911	0.603649	0.551206
										943	0.495559	0.721978	0.381218	0.886881	0.593961	0.589933
										944	0.47318	0.735682	0.423594	0.888731	0.605309	0.588942
										945	0.44852	0.724721	0.536355	0.856622	0.63539	0.568765
										946	0.436375	0.67879	0.630008	0.812634	0.678068	0.56945
										947	0.428418	0.756487	0.705799	0.775475	0.689519	0.609971
										948	0.424486	0.820518	0.721844	0.844279	0.678182	0.6663
										949	0.417876	0.850816	0.736217	0.842722	0.64336	0.710979
										950	0.419911	0.857266	0.750042	0.799901	0.647533	0.745817
										951	0.431858	0.859438	0.796564	0.743201	0.661739	0.79421
										952	0.401983	0.858503	0.867998	0.723312	0.668528	0.795249
										953	0.378173	0.871797	0.96338	0.712223	0.663276	0.746479
										954	0.361292	0.897391	1	0.675261	0.659696	0.612256
										955	0.359698	0.93781	0.993833	0.706639	0.661927	0.532828
										956	0.359257	0.926768	0.941332	0.734768	0.695909	0.490601
										957	0.359779	0.898962	0.842013	0.69026	0.70323	0.488619
										958	0.359269	0.8542	0.762645	0.678779	0.681997	0.506755
										959	0.365008	0.819423	0.710338	0.675608	0.662857	0.491288
										960	0.372538	0.790189	0.666567	0.67179	0.675741	0.444757
										961	0.344307	0.767174	0.62649	0.654668	0.717379	0.436746
										962	0.341586	0.725193	0.590729	0.641563	0.800598	0.475926
										963	0.353297	0.712854	0.57158	0.639728	0.862316	0.541013
										964	0.340903	0.739143	0.543614	0.599093	0.906687	0.605124
										965	0.35383	0.686082	0.49837	0.612804	0.926674	0.649547
										966	0.37321	0.651972	0.505629	0.70981	0.938634	0.6778
										967	0.339643	0.646761	0.504349	0.778821	0.919884	0.686251
										968	0.305098	0.645075	0.472259	0.817945	0.847476	0.672355
										969	0.273549	0.683969	0.442605	0.824603	0.783792	0.608187
										970	0.258839	0.771689	0.422048	0.84524	0.700729	0.495707
										971	0.273188	0.763384	0.419907	0.864437	0.59262	0.425953
										972	0.29494	0.731662	0.464777	0.88319	0.543947	0.37176
										973	0.29409	0.677513	0.539063	0.930273	0.510499	0.331273
										974	0.325789	0.640641	0.657776	0.972888	0.500674	0.308949
										975	0.360052	0.612457	0.692951	1	0.59285	0.348769
										976	0.361242	0.59355	0.678909	0.898939	0.67789	0.425662
										977	0.373838	0.568589	0.593594	0.797788	0.764827	0.538304
										978	0.391885	0.575862	0.554291	0.704065	0.87498	0.607505
										979	0.414504	0.620289	0.555424	0.658551	0.899601	0.635845
										980	0.397646	0.636344	0.640794	0.615766	0.8773	0.624614
										981	0.371542	0.645815	0.735564	0.586102	0.812214	0.646829
										982	0.349667	0.648921	0.824146	0.608652	0.789715	0.728281
										983	0.338211	0.629178	0.870084	0.62201	0.752598	0.847335
										984	0.327745	0.568684	0.863596	0.639056	0.682076	0.962096
										985	0.314394	0.463895	0.82477	0.680901	0.579992	1
										986	0.304776	0.41011	0.748354	0.727827	0.496116	0.972012
										987	0.305166	0.366857	0.722374	0.779927	0.433825	0.857306
										988	0.322151	0.333754	0.728602	0.841097	0.402963	0.77379
										989	0.319974	0.312361	0.763946	0.802161	0.37813	0.708824
										990	0.317597	0.276963	0.790124	0.71612	0.355972	0.661234
										991	0.31917	0.226423	0.80143	0.583542	0.326116	0.605161
										992	0.295039	0.19516	0.727127	0.455917	0.328711	0.588687
										993	0.267804	0.166577	0.640847	0.355202	0.344096	0.604176
										994	0.239956	0.140522	0.546339	0.297347	0.356038	0.642081
										995	0.218645	0.145617	0.458521	0.293175	0.362301	0.699542
										996	0.192239	0.146711	0.405984	0.281577	0.380958	0.721874
										997	0.15916	0.143404	0.382071	0.25222	0.425302	0.64188
										998	0.119183	0.130886	0.343029	0.265653	0.498802	0.507993
										999	0.087478	0.116647	0.319869	0.269806	0.550251	0.374973
										1000	0.064816	0.100713	0.31161	0.261313	0.570773	0.254432
