# Supplementary material for: Contextual and cross-modality modulation of auditory cortical processing through pulvinar mediated suppression
Source: eLife. 2020 Mar 6;9:e54157. doi: 10.7554/eLife.54157 (PMC7080503; doi:10.7554/eLife.54157)
Supplement: Figure 3—source data 1. [file elife-54157-fig3-data1.xlsx]

## Sheet: Figure 3
LP-A1 terminal activation, record monosynapic EPSC from postsynapitc neurons
L1, GAD2+			L2/3+L4, PYR			PV			SOM
Depth	EPSC (pA)		Depth	EPSC (pA)		Depth	EPSC (pA)		Depth	EPSC (pA)
26	5.2		172	0		175.2	19.087		149.7	0
91	9.4		198.2	0		209.6	0		163.8	0
84	9.7		212.4	0		255	25.391		243.2	0
73	6.8		233	0		257.7	55.589		247.7	0
50	41.1		257	0		258.7	0		250	0
82	33.1		279.6	0		259.7	23.526		264	0
85	69.6		290.2	0		266.1	48.828		297.6	0
32	37.5		294	0		268.3	0		346.6	0
50	93.7		297	0		308.5	0		364.7	0
36.6	0		321.9	0		315.8	0		369.3	0
75.6	0		348.8	0		326.8	0		371.8	0
125.5	0		379	0		327.3	0		384.4	0
127.37	0		402.4	0		343.5	0		409.2	0
142	0		432.1	0		360.1	0		420	0
			444.3	0		372	52.897		440.4	0
			468	0		398.5	0		441.4	0
			472	0		404	0		448.3	0
			485.91	0		415.7	0		473.8	0
			500	0		433.5	0		490	0
						438	0		490.1	0
						440.9	0
						441	0
						444.3	0
						445.3	0
						459.5	66.406
						463	0
