# Supplementary material for: Contextual and cross-modality modulation of auditory cortical processing through pulvinar mediated suppression
Source: eLife. 2020 Mar 6;9:e54157. doi: 10.7554/eLife.54157 (PMC7080503; doi:10.7554/eLife.54157)
Supplement: Figure 4—source data 1. [file elife-54157-fig4-data1.xlsx]

## Sheet: Figure 4
Noise evoked response of LP neurons								Response latency to 60 dB noise (ms)
	30 (dB)	40 (dB)	50 (dB)	60 (dB)	70 (dB)	80 (dB)		SC	LP	A1
Neuron 1	2.5	0.666667	2.5	7.33333	9.33333	9		8.77565	12.4134	15.5971
Neuron 2	-1.33333	-0.5	1.83333	5	13.1667	20.3333		9.72533	13.1324	13.3235
Neuron 3	3.33333	4.33333	3.33333	9.16667	12.6667	13.6667		8.35167	11.5975	15.1948
Neuron 4	1.5	2.33333	3.5	5.83333	14.3333	10.1667		8.95812	11.7785	11.8171
Neuron 5	4.33333	4.16667	5	11	22.3333	18.3333		8.87234	12.0469	11.4502
Neuron 6	12	15.8333	26.3333	39.8333	61.3333	74.3333		9.44828	12.4575	14.5344
Neuron 7	8.33333	16.8333	21.8333	22	41.3333	46		9.4928	13.4649	13.9387
Neuron 8	3.66667	14.8333	14.1667	17.6667	52.8333	56.6667		8.58031	12.6576	12.8816
Neuron 9	9.33333	16.5	23.5	45.1667	64.6667	63.8333		9.03465	13.4706
Neuron 10	8.83333	18.1667	25.1667	40.6667	55.1667	45		8.96838	13.4572
								9.26947	12.9854
								9.36405	13.3003
								9.43203	13.6419
								9.71404	12.9218
SC silencing, LP evoked response
Before	After
1	0.434862
1	0.457193
1	0.456496
1	0.489927
1	0.657049
1	0.341096
1	0.238597
1	0.241749
1.000000*	0.403692*
1	0.297036
1	0.193753
1.000000*	0.502106*
1	0.448099
1	0.525921
