# Supplementary material for: Contextual and cross-modality modulation of auditory cortical processing through pulvinar mediated suppression
Source: eLife. 2020 Mar 6;9:e54157. doi: 10.7554/eLife.54157 (PMC7080503; doi:10.7554/eLife.54157)
Supplement: Figure 5—source data 1. [file elife-54157-fig5-data1.xlsx]

## Sheet: Figure 5
SC-LP terminal stimulation, LP monosynaptic EPSC (pA)
172.03
601.71
150.998
157.3
191.76
198.877
143.7
141.77
540.3
SC ChR2 activation, A1 L2/3 response
Norm Spont FR			Norm Evoked FR			Norm SNR
LED OFF	LED ON		LED OFF	LED ON		LED OFF	LED ON
1	0.272727		1	0.501429		1	1.83857
1	0.373134		1	0.401376		1	1.07569
1	0.5		1	0.594771		1	1.18954
1	0.099		1	0.142857		1	1.443
1	0.2625		1	0.3		1	1.14286
1	0.3125		1	0.315217		1	1.0087
1	0.35		1	0.461538		1	1.31868
1	0.615385		1	0.789474		1	1.28289
1	0.45614		1	0.684685		1	1.50104
SC-LP terminal ChR2 activation, A1 L2/3 recording
Norm Spont FR			Norm Evoked FR			Norm SNR
LED OFF	LED ON		LED OFF	LED ON		LED OFF	LED ON
1	0.5		1	0.666667		1	1.33333
1	0.6667		1	0.64433		1	0.966495
1	0.5238		1	0.942857		1	1.8
1	0.6667		1	0.878049		1	1.31707
1	0.5405		1	0.806452		1	1.49194
1	0.5882		1	0.736842		1	1.25263
1	0.5		1	0.894737		1	1.78947
1	0.4688		1	0.905455		1	1.93164
1	0.5778		1	0.752336		1	1.30212
SC silencing, A1 L2/3 recording
Norm spont FR			Norm Evoked FR			Norm Bandwidth			Norm SNR
Before	After		Before	After		Before	After		Before	After
1	1.24809		1	1.10364		1	1.04708		1	0.884266
1	2.48464		1	1.6272		1	1.24869		1	0.654901
1	1.81018		1	1.38854		1	1.33654		1	0.76707
1	1.51374		1	1.44478		1	1.13109		1	0.954439
1	2.05719		1	1.34364		1	1.35995		1	0.653144
1	2.01076		1	1.59044		1	1.66671		1	0.790968
1	1.92056		1	2.41727		1	1.35157		1	1.25863
1	2.625		1	1.80606		1	1.3333		1	0.688023
1	2.87401		1	1.32885		1	2		1	0.462367
1	2.16208		1	1.92027		1	1.12371		1	0.888161
