# Supplementary material for: Contextual and cross-modality modulation of auditory cortical processing through pulvinar mediated suppression
Source: eLife. 2020 Mar 6;9:e54157. doi: 10.7554/eLife.54157 (PMC7080503; doi:10.7554/eLife.54157)
Supplement: Figure 6—source data 1. [file elife-54157-fig6-data1.xlsx]

## Sheet: Figure 6
A1 L2/3 recording
Norm Spont FR			Norm Evoked FR			Norm SNR
S	S+V		S	S+V		S	S+V
1	0.444444		1	0.49716		1	1.11861
1	0.6		1	0.734716		1	1.22453
1	0.5		1	0.685602		1	1.3712
1	0.421053		1	0.697775		1	1.65722
1	0.363636		1	0.616741		1	1.69604
1	0.52		1	0.831298		1	1.59865
1	0.666667		1	0.721526		1	1.08229
1	0.5		1	0.872		1	1.744
1	0.611111		1	0.82428		1	1.34882
1	0.454545		1	0.771004		1	1.69621
1	0.428571		1	0.652188		1	1.52177
1	0.636364		1	0.80196		1	1.26022
1	0.56		1	0.780769		1	1.39423
LP silencing, A1 L2/3 recording
S	S+V		S	S+V		S	S+V
1	0.976667		1	0.891665		1	0.912968
1	1.02333		1	1.09987		1	1.07479
1	1.16667		1	1.16234		1	0.99629
1	1.125		1	0.89942		1	0.799484
1	1.25		1	1.00121		1	0.800969
1	0.988468		1	1.11006		1	1.12301
1	1.2		1	0.973225		1	0.811021
1	0.8		1	0.987548		1	1.23443
1	0.9825		1	1.07522		1	1.09437
1	0.937826		1	0.920195		1	0.957241
1	1.08696		1	1.1587		1	1.066

## Sheet: Figure 6-fiugre supplements
Example PSTH of an LP neuron to looming stimulation
Time	FR (Hz)
0	4.89109
10	4.90099
20	2.94059
30	7.92079
40	4.9505
50	1.9802
60	3.9604
70	0.990099
80	2.9703
90	7.92079
100	4.9505
110	6.93069
120	2.9703
130	2.9703
140	8.91089
150	1.9802
160	9.90099
170	4.9505
180	9.90099
190	15.8416
200	21.7822
210	36.6337
220	37.6238
230	52.4753
240	27.7228
250	30.6931
260	43.5644
270	23.7624
280	21.7822
290	20.7921
300	23.7624
310	24.7525
320	19.802
330	17.8218
340	19.802
350	27.7228
360	23.7624
370	15.8416
380	20.7921
390	16.8317
400	16.8317
410	5.94059
420	4.9505
430	3.9604
440	3.9604
450	3.9604
460	7.92079
470	8.91089
480	3.9604
490	0
500	6.93069
510	4.9505
520	1.9802
530	9.90099
540	9.90099
550	2.9703
560	9.90099
570	5.94059
580	4.9505
590	5.94059
Evoked FR of LP neurons (Hz)
Gratings	Noise flashes	Looming Stimulation
5.62035	6.19048	7.51429
6.34248	4.39153	9.95714
4.82485	11.627	20.5857
7.90265	13.9815	26.1571
2.7881	10.1058	27.6429
6.96657	14.1931	24.7
3.96797	17.4339	27.9429
5.14976	19.7487	15.5143
7.1914	22.5397	16.3429
8.30991	20.4365	8.57143
3.34943	19.9339	12.5714
8.81952	14.3519	10.8143
7.43833	13.0556	12.5571
5.76391	10.3571
	11.0318
	9.41799
	4.49735
	7.06349
	6.54762
	4.72222
