# Supplementary figures and images for: Contextual and cross-modality modulation of auditory cortical processing through pulvinar mediated suppression
Source: eLife journal article supplement (doi:10.7554/elife.54157), 2020-03-06

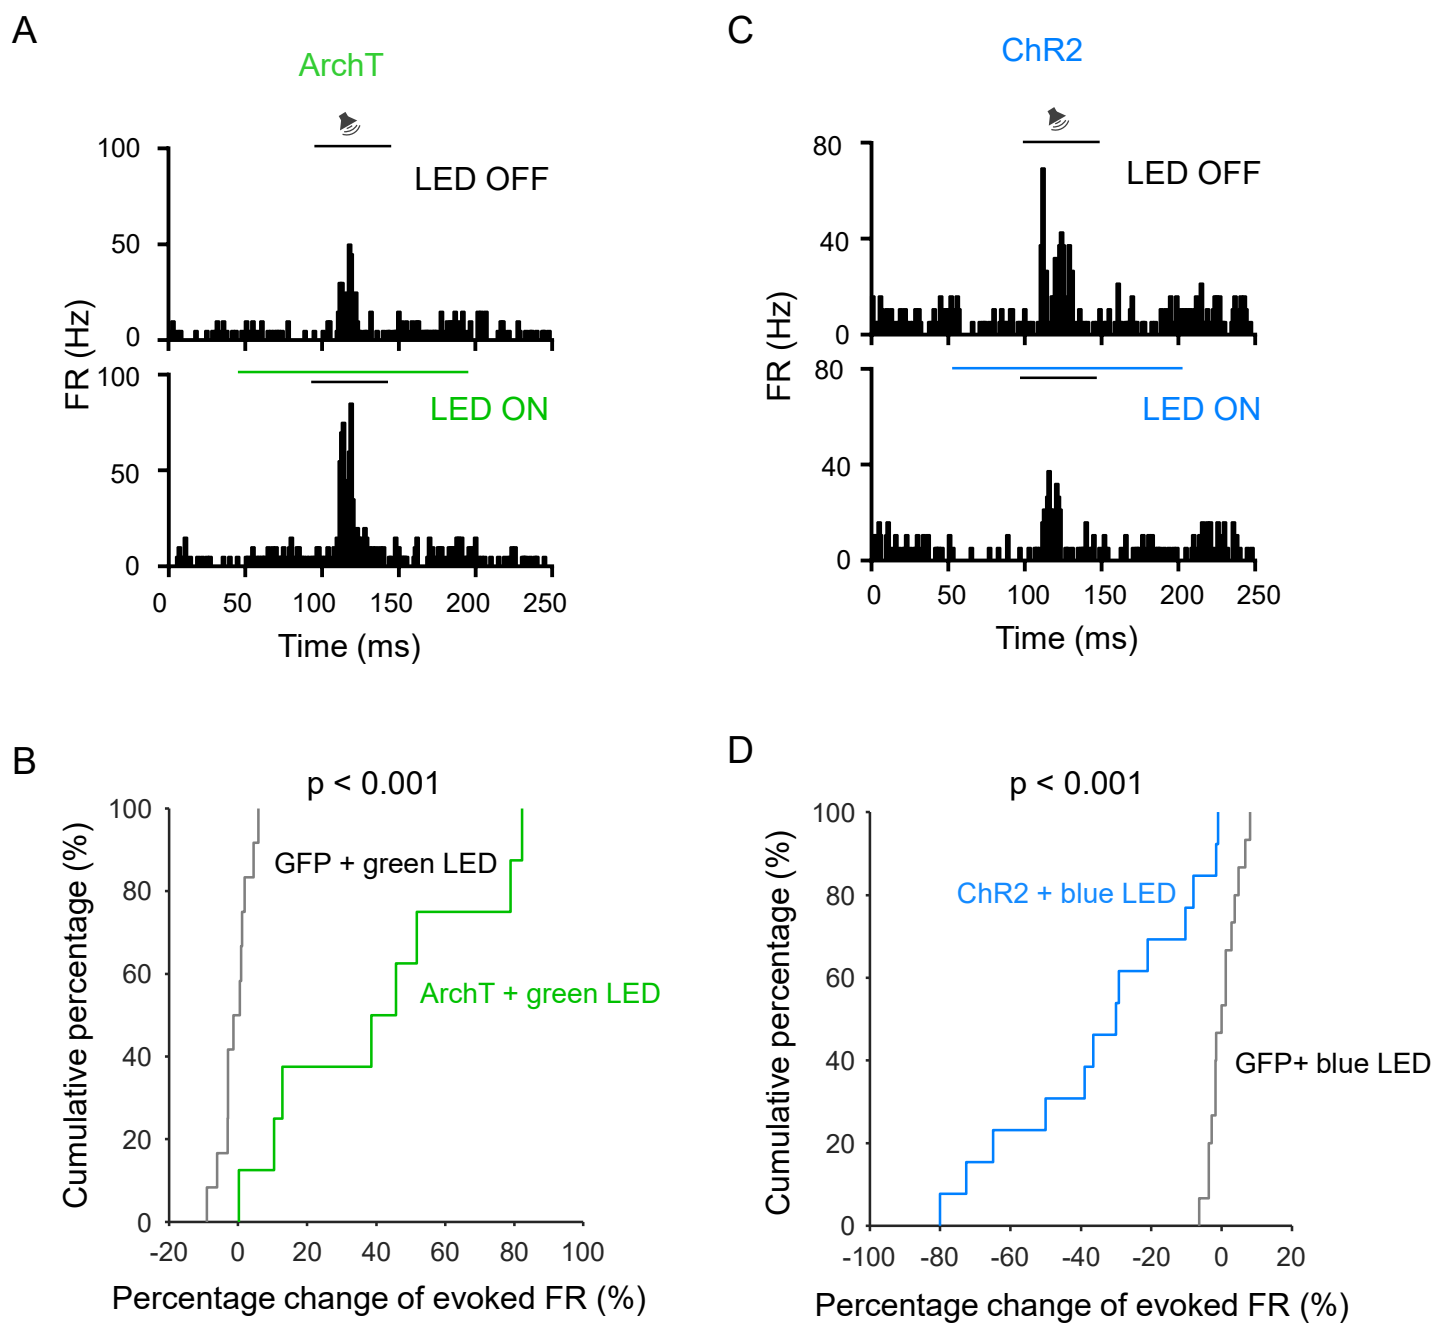

Figure 1—figure supplement 1

Supplement: supp [file elife-54157-supp-v1.zip]

A

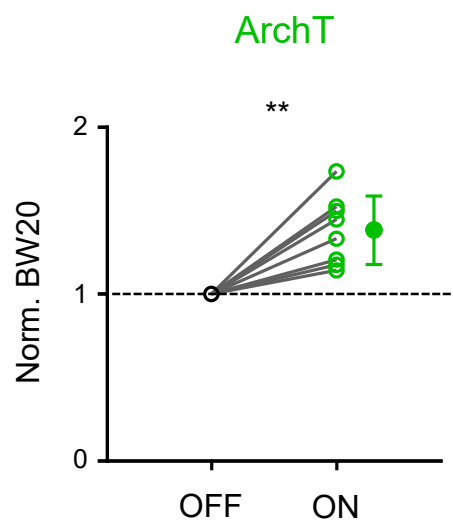

B

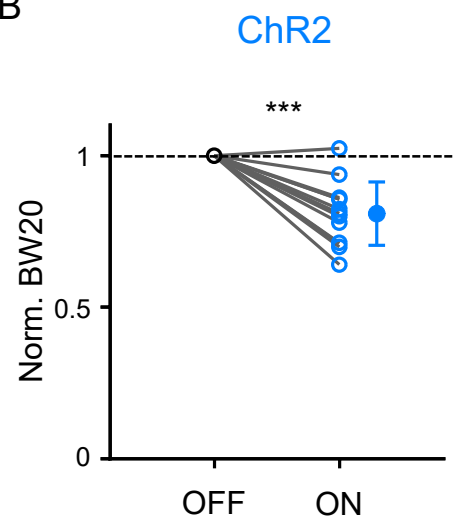

Figure 1—figure supplement 3

Supplement: supp [file elife-54157-supp-v1.zip]

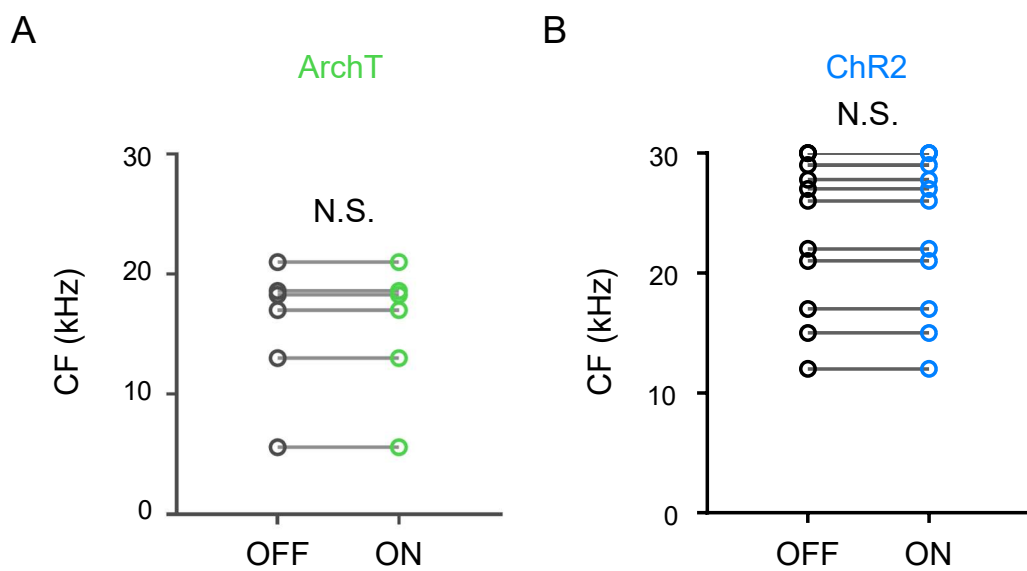

Figure 1—figure supplement 2

Supplement: supp [file elife-54157-supp-v1.zip]

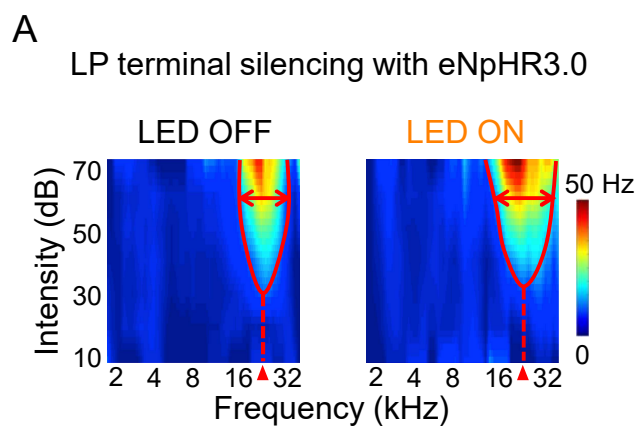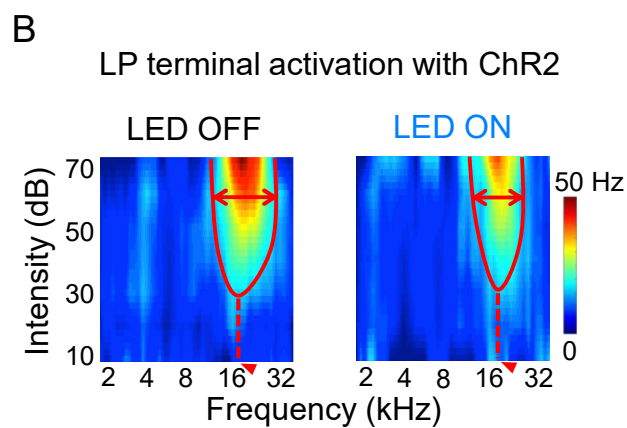

Figure 2—figure supplement 2

Supplement: supp [file elife-54157-supp-v1.zip]

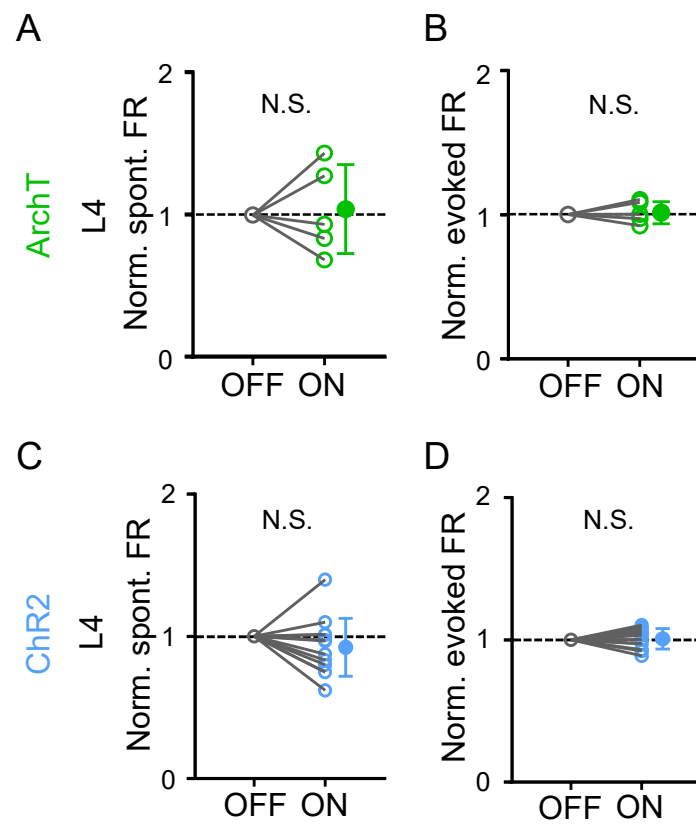

Figure 1—figure supplement 4

Supplement: supp [file elife-54157-supp-v1.zip]

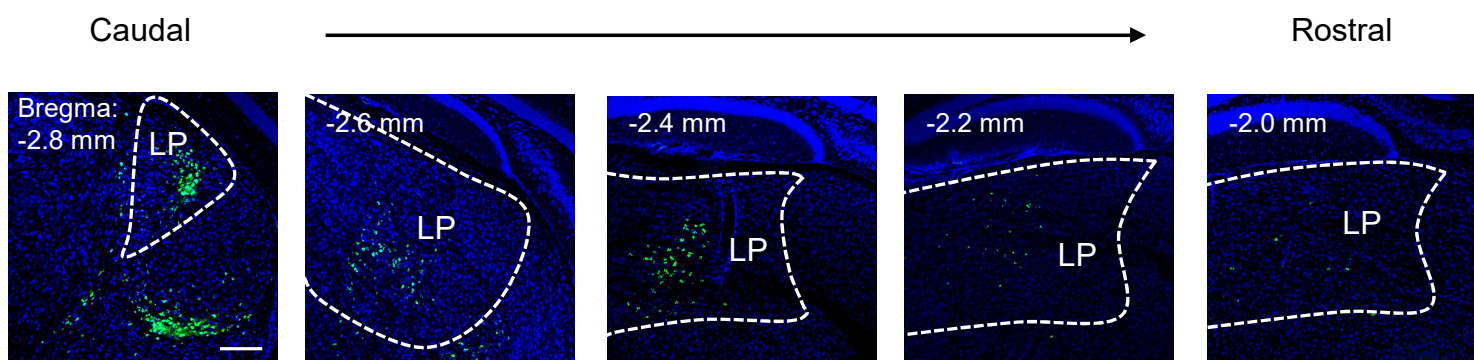

Figure 2—figure supplement 1

Supplement: supp [file elife-54157-supp-v1.zip]

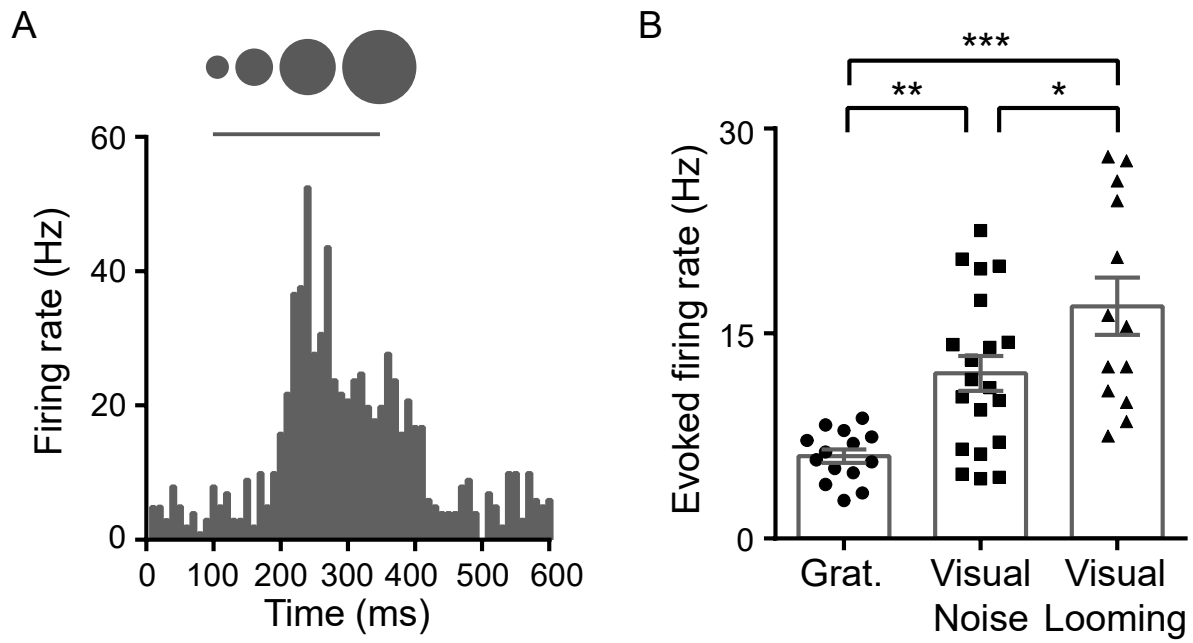

Figure 6—figure supplement 1

Supplement: supp [file elife-54157-supp-v1.zip]

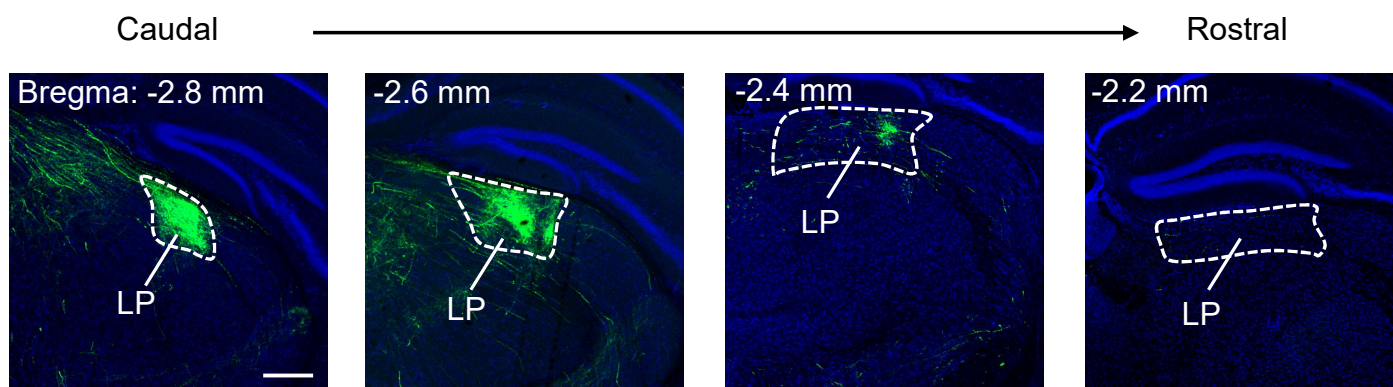

Figure 5—figure supplement 1

Supplement: supp [file elife-54157-supp-v1.zip]
